# Supplementary material for: Molecular Dialogues between Early Divergent Fungi and Bacteria in an Antagonism versus a Mutualism
Source: PubMed Central journal article supplement (PMC7482071; doi:10.1128/mbio.02088-20), 2020-09-08
Supplement: mBio.02088-20-sf001.pdf [file mBio.02088-20-sf001.pdf]

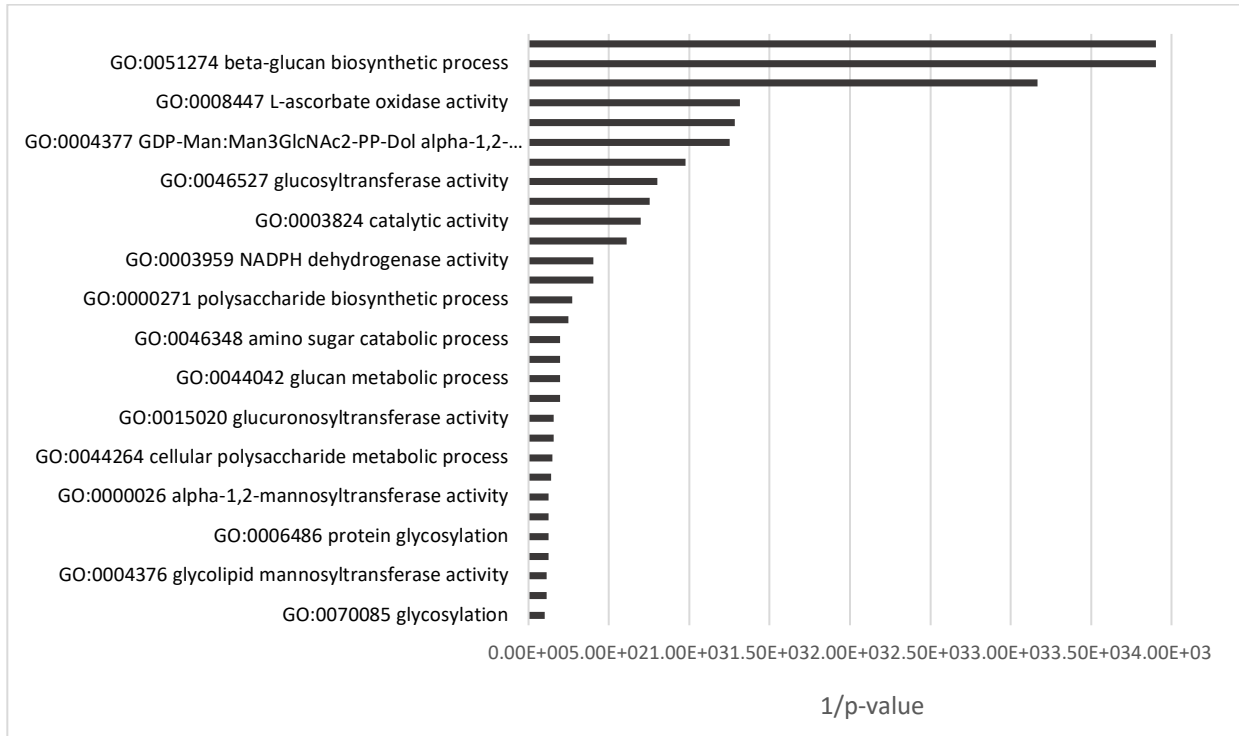

**Figure S1. GO categories enriched in the upregulated fraction of the DE *Rm* non-host (ATCC 11559) genes in response to physical interaction with *Meceto habitans* sp. B13.**
