# Supplementary material for: Molecular Dialogues between Early Divergent Fungi and Bacteria in an Antagonism versus a Mutualism
Source: PubMed Central journal article supplement (PMC7482071; doi:10.1128/mbio.02088-20), 2020-09-08
Supplement: mBio.02088-20-st001.pdf [file mBio.02088-20-st001.pdf]

**Table S1. Genome statistics for *Mycetohabitans* sp. B13 and *Mycetohabitans* sp. B14 as well as previously sequenced *Mycetohabitans* included for comparison.**

|                                   | <i>Mycetohabitans</i> sp. B13 | <i>Mycetohabitans</i> sp. B14 | <i>M. rhizoxinica</i> HKI454     | <i>M. endofungorum</i> HKI<br>456 |
|-----------------------------------|-------------------------------|-------------------------------|----------------------------------|-----------------------------------|
| <b>DNA, total number of bases</b> | 3579262                       | 3653645                       | 3750138                          | 328408                            |
| <b>DNA coding number of bases</b> | 87.50%                        | 87.08%                        | 88.73%                           | 85.75%                            |
| <b>DNA G+C number of bases</b>    | 60.59%                        | 60.56%                        | 60.71%                           | 61.27%                            |
| <b>DNA scaffolds</b>              | 2                             | 3                             | 3                                | 76                                |
| <b>Genes total number</b>         | 3292                          | 3465                          | 3938                             | 3051                              |
| <b>Protein coding genes</b>       | 3219                          | 3394                          | 3870                             | 2631                              |
| <b>Pseudo Genes</b>               | 404                           | 417                           | NA                               | 369                               |
| <b>RNA genes</b>                  | 73                            | 71                            | 68                               | 62                                |
| <b>rRNA genes</b>                 | 9                             | 9                             | 9                                | 5                                 |
| <b>5S rRNA</b>                    | 3                             | 3                             | 3                                | 3                                 |
| <b>16S rRNA</b>                   | 3                             | 3                             | 3                                | 1                                 |
| <b>23S rRNA</b>                   | 3                             | 3                             | 3                                | 1                                 |
| <b>tRNA genes</b>                 | 47                            | 47                            | 59                               | 43                                |
| <b>Other RNA genes</b>            | 17                            | 15                            | NA                               | 5                                 |
| <b>Reference</b>                  | This study                    | This study                    | (1)                              | (2)                               |
| <b>GenBank accession number</b>   | FTPM01000000                  | FTPJ01000000                  | FR687359<br>FR687360<br>FR687361 | GCA_002927045                     |
| <b>Fungal host</b>                | ATCC 52813                    | ATCC 52814                    | ATCC 62417                       | CBS 112285                        |

1. Lackner G, Moebius N, Partida-Martinez L, Hertweck C. 2011. Complete genome sequence of *Burkholderia rhizoxinica*, an endosymbiont of *Rhizopus microsporus*. *Journal of Bacteriology* 193:783-784.
2. Estrada-de Los Santos P, Palmer M, Chavez-Ramirez B, Beukes C, Steenkamp ET, Briscoe L, Khan N, Maluk M, Lafos M, Humm E, Arrabit M, Crook M, Gross E, Simon MF, Dos Reis Junior FB, Whitman WB, Shapiro N, Poole PS, Hirsch AM, Venter SN, James EK. 2018. Whole genome analyses suggests that *Burkholderia* sensu lato contains two additional novel genera (*Mycetohabitans* gen. nov., and *Trinickia* gen. nov.): Implications for the evolution of diazotrophy and nodulation in the Burkholderiaceae. *Genes* 9:389.
