# Supplementary material for: Molecular Dialogues between Early Divergent Fungi and Bacteria in an Antagonism versus a Mutualism
Source: PubMed Central journal article supplement (PMC7482071; doi:10.1128/mbio.02088-20), 2020-09-08
Supplement: mBio.02088-20-st002.pdf [file mBio.02088-20-st002.pdf]

**Table S2. Signaling genes DE in the *Rm* host fungi (ATCC 52813) during physical interaction with endobacteria.** Log<sub>2</sub>FC, log<sub>2</sub> fold change; positive Log<sub>2</sub>FC values denote upregulated genes, negative Log<sub>2</sub>FC values denote downregulated genes; FDR, false discovery rate.

| Protein ID | Log <sub>2</sub> FC | FDR      | IPR ID                                                        | IPR domain                                                                                                                                                                                                | KOG ID  | KOG annotation                                                                        | KOG class                                                     | GO ID      | GO category                                   |
|------------|---------------------|----------|---------------------------------------------------------------|-----------------------------------------------------------------------------------------------------------------------------------------------------------------------------------------------------------|---------|---------------------------------------------------------------------------------------|---------------------------------------------------------------|------------|-----------------------------------------------|
| 315343     | 3.78                | 2.47E-05 | IPR001206                                                     | Diacylglycerol kinase                                                                                                                                                                                     | KOG1169 | Diacylglycerol kinase                                                                 | Lipid transport and metabolism                                | GO:0007205 | protein kinase C activation                   |
| 252161     | 2.65                | 1.07E-07 | IPR000198                                                     | RhoGAP                                                                                                                                                                                                    | KOG2710 | Rho GTPase-activating protein                                                         | Signal transduction mechanisms                                | GO:0007165 | signal transduction                           |
| 60967      | 2.56                | 6.10E-04 | IPR000219                                                     | Dbl homology (DH) domain                                                                                                                                                                                  | KOG4305 | RhoGEF GTPase                                                                         | Signal transduction mechanisms                                | GO:0035023 | regulation of Rho protein signal transduction |
| 249145     | 2.06                | 1.19E-09 | IPR001206                                                     | Diacylglycerol kinase                                                                                                                                                                                     | KOG1169 | Diacylglycerol kinase                                                                 | Lipid transport and metabolism                                | GO:0007205 | activation of protein kinase C activity       |
| 136105     | 2.00                | 2.07E-08 | IPR001806                                                     | Ras GTPase                                                                                                                                                                                                | KOG0393 | Ras-related small GTPase, Rho type                                                    | General function prediction only                              | GO:0007264 | small GTPase mediated signal transduction     |
| 264384     | 1.97                | 2.88E-13 | none                                                          | no domains                                                                                                                                                                                                | KOG2058 | Ypt/Rab GTPase activating protein                                                     | Intracellular trafficking, secretion, and vesicular transport | GO:0004308 | exo-alpha-sialidase activity                  |
| 185441     | 1.81                | 1.24E-06 | IPR017442                                                     | Serine/threonine protein kinase-related                                                                                                                                                                   | KOG0612 | Rho-associated, coiled-coil containing protein kinase                                 | Signal transduction mechanisms                                | GO:0006468 | protein amino acid phosphorylation            |
| 271786     | 1.72                | 2.78E-04 | IPR000219                                                     | Dbl homology (DH) domain                                                                                                                                                                                  | KOG4424 | Predicted Rho/Rac guanine nucleotide exchange factor/faciogenital dysplasia protein 3 | Signal transduction mechanisms                                | GO:0035023 | regulation of Rho protein signal transduction |
| 201417     | 1.41                | 4.72E-13 | IPR001789<br>IPR003661<br>IPR013655<br>IPR013655<br>IPR001610 | Signal transduction response regulator, receiver region; Signal transduction histidine kinase, subgroup 1, dimerisation and phosphoacceptor region; PAS fold-3.ATP-binding region, ATPase-like, PAC motif | KOG0519 | Sensory transduction histidine kinase                                                 | Signal transduction mechanisms                                | GO:0007165 | signal transduction                           |

| Protein ID | Log <sub>2</sub> FC | FDR      | IPR ID                              | IPR domain                                                                             | KOG ID  | KOG annotation                                                   | KOG class                        | GO ID      | GO category                            |
|------------|---------------------|----------|-------------------------------------|----------------------------------------------------------------------------------------|---------|------------------------------------------------------------------|----------------------------------|------------|----------------------------------------|
| 286008     | 1.22                | 3.15E-04 | IPR002373                           | cAMP/cGMP-dependent protein kinase                                                     | KOG1113 | cAMP-dependent protein kinase types I and II, regulatory subunit | Signal transduction mechanisms   | GO:0006468 | protein amino acid phosphorylation     |
| 274088     | 1.21                | 3.24E-05 | IPR000198                           | RhoGAP                                                                                 | KOG4270 | GTPase-activator protein                                         | Signal transduction mechanisms   | GO:0007165 | signal transduction                    |
| 266182     | 1.19                | 5.69E-04 | IPR000719<br>IPR003096<br>IPR001715 | Protein kinase, core, SM22/calponin, Calponin-like actin-binding                       | KOG0198 | MEKK and related serine/threonine protein kinases                | Signal transduction mechanisms   | GO:0006468 | protein amino acid phosphorylation     |
| 234989     | 1.16                | 1.06E-04 | IPR017442                           | Serine/threonine protein kinase-related                                                | KOG0667 | Dual-specificity tyrosine-phosphorylation regulated kinase       | General function prediction only | GO:0006468 | protein amino acid phosphorylation     |
| 226218     | 1.01                | 4.85E-03 | IPR001060<br>IPR000198              | Cdc15/Fes/CIP4, RhoGAP                                                                 | KOG1450 | Predicted Rho GTPase-activating protein                          | Signal transduction mechanisms   | GO:0007165 | signal transduction                    |
| 300418     | 1.00                | 3.11E-05 | IPR000719<br>IPR008352              | Protein kinase, core, MAP kinase, p38                                                  | KOG0660 | Mitogen-activated protein kinase                                 | Signal transduction mechanisms   | GO:0006468 | protein amino acid phosphorylation     |
| 235547     | 1.00                | 4.26E-07 | IPR002219<br>IPR001452<br>IPR001060 | Protein kinase C, phorbol ester/diacylglycerol binding, Src homology-3, Cdc15/Fes/CIP4 | KOG3565 | Cdc42-interacting protein CIP4                                   | Cytoskeleton                     | GO:0007242 | intracellular signaling cascade        |
| 278678     | 0.90                | 3.20E-03 | IPR017442                           | Serine/threonine protein kinase-related                                                | KOG0616 | cAMP-dependent protein kinase catalytic subunit (PKA)            | Signal transduction mechanisms   | GO:0006468 | protein amino acid phosphorylation     |
| 233858     | 0.85                | 1.89E-03 | IPR001164                           | Arf GTPase activating protein                                                          | KOG0702 | Predicted GTPase-activating protein                              | Signal transduction mechanisms   | GO:0008060 | ARF GTPase activator activity          |
| 277000     | 0.84                | 5.10E-03 | IPR001849<br>IPR001164              | Pleckstrin-like, Arf GTPase activating protein                                         | KOG0521 | Putative GTPase activating proteins (GAPs)                       | Signal transduction mechanisms   | GO:0008060 | ARF GTPase activator activity          |
| 202982     | 0.82                | 6.04E-04 | IPR002498                           | Phosphatidylinositol-4-phosphate 5-kinase, core                                        | KOG0229 | Phosphatidylinositol-4-phosphate 5-kinase                        | Signal transduction mechanisms   | GO:0046488 | phosphatidylinositol metabolic process |

| Protein ID | Log <sub>2</sub> FC | FDR      | IPR ID                              | IPR domain                                                                                                              | KOG ID  | KOG annotation                                                                           | KOG class                             | GO ID      | GO category                                 |
|------------|---------------------|----------|-------------------------------------|-------------------------------------------------------------------------------------------------------------------------|---------|------------------------------------------------------------------------------------------|---------------------------------------|------------|---------------------------------------------|
| 270618     | 0.74                | 1.99E-03 | IPR013079<br>IPR003094<br>IPR013078 | Bifunctional 6-phosphofructo-2-kinase/fructose-2,6-bisphosphatase, Fructose-2,6-bisphosphatase, Phosphoglycerate mutase | KOG0234 | Fructose-6-phosphate 2-kinase/fructose-2,6-bisphosphatase                                | Carbohydrate transport and metabolism | GO:0006003 | fructose 2,6-bisphosphate metabolic process |
| 286014     | 0.72                | 4.26E-03 | IPR000719<br>IPR008352              | Protein kinase, core, MAP kinase, p38                                                                                   | KOG0660 | Mitogen-activated protein kinase                                                         | Signal transduction mechanisms        | GO:0006468 | protein amino acid phosphorylation          |
| 236201     | 0.70                | 1.57E-04 | IPR001199                           | Cytochrome b5                                                                                                           | KOG4035 | Coeffector of mDia Rho GTPase, regulates actin polymerization and cell adhesion turnover | Cytoskeleton                          | GO:0046914 | transition metal ion binding                |
| 237596     | 0.69                | 4.25E-04 | IPR000198                           | RhoGAP                                                                                                                  | KOG4270 | GTPase-activator protein                                                                 | Signal transduction mechanisms        | GO:0007165 | signal transduction                         |
| 234830     | 0.66                | 9.11E-03 | IPR002073<br>IPR011006              | 3'5'-cyclic nucleotide phosphodiesterase, CheY-like                                                                     | KOG3689 | Cyclic nucleotide phosphodiesterase                                                      | Signal transduction mechanisms        | GO:0007165 | signal transduction                         |
| 268827     | 0.65                | 2.36E-03 | IPR003109                           | GoLoco                                                                                                                  |         |                                                                                          |                                       | GO:0007165 | signal transduction                         |
| 250648     | 0.63                | 9.71E-03 | IPR001806<br>IPR017441              | Ras GTPase, Protein kinase ATP binding, conserved site                                                                  | KOG4423 | GTP-binding protein-like, RAS superfamily                                                | Signal transduction mechanisms        | GO:0007264 | small GTPase mediated signal transduction   |
| 244189     | 0.50                | 5.10E-03 | IPR002014<br>IPR000306<br>IPR003903 | VHS, Zinc finger, FYVE-type, Ubiquitin interacting motif                                                                | KOG1818 | Membrane trafficking and cell signaling protein HRS, contains VHS and FYVE domains       | Signal transduction mechanisms        | GO:0006886 | intracellular protein transport             |
| 197380     | -0.55               | 4.85E-04 | IPR005946                           | Phosphoribosyl pyrophosphokinase                                                                                        |         |                                                                                          |                                       |            |                                             |

| Protein ID | Log <sub>2</sub> FC | FDR      | IPR ID                                           | IPR domain                                                                                                                                | KOG ID  | KOG annotation                                                   | KOG class                                                     | GO ID      | GO category                                    |
|------------|---------------------|----------|--------------------------------------------------|-------------------------------------------------------------------------------------------------------------------------------------------|---------|------------------------------------------------------------------|---------------------------------------------------------------|------------|------------------------------------------------|
| 233491     | -0.57               | 4.69E-04 | IPR001048<br>IPR000706<br>IPR000534              | Aspartate/glutamate/uridylylate kinase, N-acetyl-gamma-glutamyl-phosphate reductase, Semialdehyde dehydrogenase, NAD-binding              | KOG2436 | Acetylglutamate kinase/acetylglutamate synthase                  | Amino acid transport and metabolism                           | GO:0006520 | amino acid metabolic process                   |
| 284787     | -0.61               | 1.06E-03 | IPR002290                                        | Serine/threonine protein kinase                                                                                                           | KOG3741 | Poly(A) ribonuclease subunit                                     | RNA processing and modification                               | GO:0006468 | protein amino acid phosphorylation             |
| 236630     | -0.63               | 6.23E-03 | IPR001849<br>IPR000219<br>IPR000270<br>IPR001331 | Pleckstrin-like, Dbl homology (DH) domain, Octicosapeptide/P hox/Bem1p, Guanine-nucleotide dissociation stimulator, CDC24, conserved site | KOG3519 | Invasion-inducing protein TIAM1/CDC24 and related RhoGEF GTPases | Signal transduction mechanisms                                | GO:0005089 | Rho guanyl-nucleotide exchange factor activity |
| 284927     | -0.69               | 8.96E-04 | IPR016034                                        | Phosphatidylinositol-4-phosphate 5-kinase, core, subgroup                                                                                 | KOG0229 | Phosphatidylinositol-4-phosphate 5-kinase                        | Signal transduction mechanisms                                | GO:0046488 | phosphatidylinositol metabolic process         |
| 200320     | -0.76               | 6.26E-03 | IPR000195                                        | RabGAP/TBC                                                                                                                                | KOG2058 | Ypt/Rab GTPase activating protein                                | Intracellular trafficking, secretion, and vesicular transport | GO:0005097 | Rab GTPase activator activity                  |
| 235463     | -0.76               | 4.66E-03 | IPR001895<br>IPR000651                           | Guanine-nucleotide dissociation stimulator CDC25, Guanine nucleotide exchange factor for Ras-like GTPases, N-terminal                     | KOG3417 | Ras1 guanine nucleotide exchange factor                          | Signal transduction mechanisms                                | GO:0005085 | guanyl-nucleotide exchange factor activity     |
| 15091      | -0.81               | 3.17E-03 | IPR008936                                        | Rho GTPase activation protein                                                                                                             |         |                                                                  |                                                               | GO:0007165 | signal transduction                            |

| Protein ID | Log <sub>2</sub> FC | FDR      | IPR ID                 | IPR domain                                                           | KOG ID  | KOG annotation                                                                     | KOG class                                                  | GO ID      | GO category                                            |
|------------|---------------------|----------|------------------------|----------------------------------------------------------------------|---------|------------------------------------------------------------------------------------|------------------------------------------------------------|------------|--------------------------------------------------------|
| 88449      | -0.81               | 1.17E-04 | IPR000719              | Protein kinase, core                                                 |         |                                                                                    |                                                            | GO:0004672 | protein kinase activity                                |
| 199697     | -0.83               | 1.64E-04 | IPR001048              | Aspartate/ glutamate/ uridylate kinase                               | KOG0456 | Aspartate kinase                                                                   | Amino acid transport and metabolism                        | GO:0008652 | amino acid biosynthetic process                        |
| 313597     | -0.83               | 9.83E-06 | IPR000403<br>IPR016024 | Phosphatidylinositol 3- and 4-kinase, catalytic, Armadillo-type fold | KOG0903 | Phosphatidylinositol 4-kinase, involved in intracellular trafficking and secretion | Signal transduction mechanisms                             | GO:0016773 | phosphotransferase activity, alcohol group as acceptor |
| 222087     | -1.27               | 7.48E-19 | IPR017442              | Serine/threonine protein kinase-related                              | KOG0590 | Checkpoint kinase and related serine/threonine protein kinases                     | Cell cycle control, cell division, chromosome partitioning | GO:0006468 | protein amino acid phosphorylation                     |
