# Supplementary material for: Molecular Dialogues between Early Divergent Fungi and Bacteria in an Antagonism versus a Mutualism
Source: PubMed Central journal article supplement (PMC7482071; doi:10.1128/mbio.02088-20), 2020-09-08
Supplement: mBio.02088-20-st003.pdf [file mBio.02088-20-st003.pdf]

**Table S3. Cell cycle related genes DE in the host (ATCC 52813) during physical interaction with *Mycetohabitans* sp. B13.** Log<sub>2</sub>FC, log<sub>2</sub> fold change; positive Log<sub>2</sub>FC values denote upregulated genes, negative Log<sub>2</sub>FC values denote downregulated genes; false discovery rate, FDR.

| Protein ID | Log <sub>2</sub> FC | FDR      | Interpro ID                         | Domain                                                                                                                                     | KOG ID  | KOG definition                                                              | KOG Class                                                  |
|------------|---------------------|----------|-------------------------------------|--------------------------------------------------------------------------------------------------------------------------------------------|---------|-----------------------------------------------------------------------------|------------------------------------------------------------|
| 232829     | 1.69                | 1.08E-07 | IPR001060<br>IPR001452              | Cdc15/Fes/CIP4,<br>Src homology-3                                                                                                          | KOG2398 | Predicted proline-serine-threonine phosphatase-interacting protein (PSTPIP) | Cell cycle control, cell division, chromosome partitioning |
| 286595     | 1.16                | 1.59E-11 | IPR007632                           | Protein of unknown function DUF590                                                                                                         | KOG2513 | Protein required for meiotic chromosome segregation                         | Cell cycle control, cell division, chromosome partitioning |
| 312571     | 1.00                | 6.81E-03 | IPR001452<br>IPR001060              | Src homology-3,<br>Cdc15/Fes/CIP4                                                                                                          | KOG2398 | Predicted proline-serine-threonine phosphatase-interacting protein (PSTPIP) | Cell cycle control, cell division, chromosome partitioning |
| 294963     | 0.77                | 1.95E-05 | IPR007087<br>IPR015880              | Zinc finger, C2H2-type, Zinc finger, C2H2-like                                                                                             | KOG4124 | Putative transcriptional repressor regulating G2/M transition               | Cell cycle control, cell division, chromosome partitioning |
| 232886     | 0.73                | 3.06E-06 | IPR001005<br>IPR009057              | SANT, DNA-binding                                                                                                                          | KOG2043 | Signaling protein SWIFT and related BRCT domain proteins                    | Cell cycle control, cell division, chromosome partitioning |
| 232349     | 0.72                | 1.71E-03 | IPR005045                           | Protein of unknown function DUF284                                                                                                         | KOG2952 | Cell cycle control protein                                                  | Signal transduction mechanisms                             |
| 215598     | -0.81               | 0.0016   | IPR011025<br>IPR001019<br>IPR002975 | G protein alpha subunit, helical insertion, Guanine nucleotide binding protein (G-protein), alpha subunit, Fungal G-protein, alpha subunit | KOG0082 | G-protein alpha subunit (small G protein superfamily)                       | Cell cycle control, cell division, chromosome partitioning |
| 222087     | -1.27               | 7.48E-19 | IPR000719<br>IPR017442              | Protein kinase, core Serine/threonine protein kinase-related                                                                               | KOG0590 | Checkpoint kinase and related serine/threonine protein kinases              | Cell cycle control, cell division, chromosome partitioning |
