# Supplementary material for: Molecular Dialogues between Early Divergent Fungi and Bacteria in an Antagonism versus a Mutualism
Source: PubMed Central journal article supplement (PMC7482071; doi:10.1128/mbio.02088-20), 2020-09-08
Supplement: mBio.02088-20-st004.pdf [file mBio.02088-20-st004.pdf]

**Table S4. Candidate T3SS effectors upregulated in *Mycetohabitans* sp. B13 during pre-contact and physical contact with the *Rm* host (ATCC 52813) and the *Rm* non-host (ATCC 11559). ND, not detected.**

| Protein ID              | Effective T3 Score | Eukaryotic-like domain | IMG annotation                                                                              |
|-------------------------|--------------------|------------------------|---------------------------------------------------------------------------------------------|
| <b>Pre-contact</b>      |                    |                        |                                                                                             |
| 2599762763              | 1                  | ND                     | hypothetical protein                                                                        |
| 2599763016              | 1                  | ND                     | hypothetical protein                                                                        |
| 2599763274              | 1                  | PF11937 10             | Protein of unknown function (DUF3455)                                                       |
| 2599763295              | 1                  | ND                     | hypothetical protein                                                                        |
| 2599763359              | 1                  | ND                     | hypothetical protein                                                                        |
| 2599763360              | 1                  | ND                     | hypothetical protein                                                                        |
| 2599763806              | 1                  | ND                     | hypothetical protein                                                                        |
| 2599764438              | 1                  | PF00158 5;PF02954 4    | Response regulator containing CheY-like receiver, AAA-type ATPase, and DNA-binding domains  |
| 2599764562              | 1                  | ND                     | hypothetical protein                                                                        |
| 2599764578              | 1                  | ND                     | hypothetical protein                                                                        |
| 2599765017              | 1                  | ND                     | prevent-host-death family protein                                                           |
| 2599765018              | 0.99955            | ND                     | putative toxin-antitoxin system toxin component, PIN family                                 |
| 2599765428              | 0.99955            | ND                     | hypothetical protein                                                                        |
| 2599765571              | 0.98923            | PF01557 6              | 2-keto-4-pentenoate hydratase                                                               |
| 2599765640              | 1                  | ND                     | Transglycosylase SLT domain                                                                 |
| 2599765794              | 1                  | PF00483 5;PF01050 5    | mannose-1-phosphate guanylyltransferase/mannose-6-phosphate isomerase                       |
| <b>Physical contact</b> |                    |                        |                                                                                             |
| 2599762710              | 1                  | ND                     | hypothetical protein                                                                        |
| 2599762745              | 1                  | ND                     | hypothetical protein                                                                        |
| 2599762753              | 1                  | ND                     | hypothetical protein                                                                        |
| 2599762755              | 1                  | PF00106 5              | Dehydrogenases with different specificities (related to short-chain alcohol dehydrogenases) |
| 2599762763              | 1                  | ND                     | hypothetical protein                                                                        |
| 2599763016              | 1                  | ND                     | hypothetical protein                                                                        |
| 2599763051              | 1                  | ND                     | hypothetical protein                                                                        |
| 2599763258              | 1                  | ND                     | hypothetical protein                                                                        |
| 2599763274              | 1                  | PF11937 10             | Protein of unknown function (DUF3455)                                                       |
| 2599763292              | 1                  | ND                     | hypothetical protein                                                                        |
| 2599763295              | 1                  | ND                     | hypothetical protein                                                                        |
| 2599763314              | 1                  | ND                     | hypothetical protein                                                                        |
| 2599763359              | 1                  | ND                     | hypothetical protein                                                                        |
| 2599763360              | 1                  | ND                     | hypothetical protein                                                                        |
| 2599763566              | 1                  | PF16576 4              | Multidrug resistance efflux pump                                                            |
| 2599763567              | 0.99997            | PF07690 6              | drug resistance transporter, EmrB/QacA subfamily                                            |
| 2599763623              | 1                  | PF13516 56             | Leucine Rich repeat                                                                         |
| 2599763806              | 1                  | ND                     | hypothetical protein                                                                        |
| 2599763826              | 1                  | PF04632 7              | Predicted membrane protein                                                                  |

| Protein ID | Effective T3 Score | Eukaryotic-like domain | IMG annotation                                                                                   |
|------------|--------------------|------------------------|--------------------------------------------------------------------------------------------------|
| 2599763864 | 1                  | PF00848 14;PF00355 9   | Phenylpropionate dioxygenase and related ring-hydroxylating dioxygenases, large terminal subunit |
| 2599763909 | 1                  | PF00528 7              | phosphate ABC transporter membrane protein 2, PhoT family (TC 3.A.1.7.1)                         |
| 2599763968 | 1                  | ND                     | anti sigma-E protein, RseA                                                                       |
| 2599764195 | 1                  | PF00180 4              | isocitrate dehydrogenase (NADP) (EC 1.1.1.42)                                                    |
| 2599764211 | 1                  | PF01649 16             | SSU ribosomal protein S20P                                                                       |
| 2599764253 | 1                  | PF01025 4              | Molecular chaperone GrpE (heat shock protein)                                                    |
| 2599764438 | 1                  | PF00158 5;PF02954 4    | Response regulator containing CheY-like receiver, AAA-type ATPase, and DNA-binding domains       |
| 2599764562 | 1                  | ND                     | hypothetical protein                                                                             |
| 2599764578 | 1                  | ND                     | hypothetical protein                                                                             |
| 2599764584 | 1                  | ND                     | phenylacetate-CoA oxygenase, PaaG subunit                                                        |
| 2599764628 | 1                  | PF13561 5              | Dehydrogenases with different specificities (related to short-chain alcohol dehydrogenases)      |
| 2599764718 | 1                  | ND                     | hypothetical protein                                                                             |
| 2599765017 | 1                  | ND                     | prevent-host-death family protein                                                                |
| 2599765167 | 1                  | PF02812 4              | Glutamate dehydrogenase/leucine dehydrogenase                                                    |
| 2599765172 | 1                  | ND                     | hypothetical protein                                                                             |
| 2599765247 | 0.99994            | PF02629 7;PF00549 6    | succinyl-CoA synthetase (ADP-forming) alpha subunit (EC 6.2.1.5)                                 |
| 2599765375 | 1                  | ND                     | hypothetical protein                                                                             |
| 2599765431 | 0.99989            | ND                     | <i>btl13-19</i>                                                                                  |
| 2599765433 | 0.99996            | PF00271 5              | Superfamily II DNA and RNA helicases                                                             |
| 2599765537 | 1                  | PF03972 10             | MmgE/PrpD family                                                                                 |
| 2599765541 | 1                  | PF07702 5;PF00392 6    | Transcriptional regulators                                                                       |
| 2599765547 | 1                  | PF00285 7              | citrate synthase (EC 2.3.3.1)                                                                    |
| 2599765640 | 1                  | ND                     | Transglycosylase SLT domain                                                                      |
| 2599765719 | 1                  | ND                     | hypothetical protein                                                                             |
| 2599765780 | 1                  | PF12937 6              | F-box-like                                                                                       |
| 2599765782 | 0.99965            | ND                     | hypothetical protein                                                                             |
| 2599765789 | 1                  | ND                     | O-antigen ligase like membrane protein                                                           |
| 2599765794 | 1                  | PF00483 5;PF01050 5    | mannose-1-phosphate guanylyltransferase/mannose-6-phosphate isomerase                            |
| 2599765796 | 1                  | ND                     | hypothetical protein                                                                             |
