# Supplementary material for: Molecular Dialogues between Early Divergent Fungi and Bacteria in an Antagonism versus a Mutualism
Source: PubMed Central journal article supplement (PMC7482071; doi:10.1128/mbio.02088-20), 2020-09-08
Supplement: mBio.02088-20-st005.pdf [file mBio.02088-20-st005.pdf]

**Table S5. DE *Mycetohabitans* sp. B13 genes involved in ROS detoxification during physical interaction with host *Rm* ATCC 52813 and non-host *Rm* ATCC 11559 fungi.** Log<sub>2</sub>FC, log<sub>2</sub> fold change; positive Log<sub>2</sub>FC values denote upregulated genes, negative Log<sub>2</sub>FC values denote downregulated genes; FDR, false discovery rate.

| Protein ID                     | Log <sub>2</sub> FC | FDR        | Annotation                                   |
|--------------------------------|---------------------|------------|----------------------------------------------|
| <b>In response to non-host</b> |                     |            |                                              |
| 2599764464                     | 1.31422836          | 1.46E-07   | Glutathione S-transferase                    |
| 2599765053                     | 1.05582174          | 6.05E-07   | Glutathione synthase (EC 6.3.2.3)            |
| 2599763895                     | 2.81256826          | 1.53E-46   | Thioredoxin                                  |
| 2599765053                     | 1.05582174          | 6.05E-07   | Glutathione synthase (EC 6.3.2.3)            |
| 2599764015                     | 1.29351515          | 0.00906441 | Coenzyme A pyrophosphatase                   |
| 2599764292                     | 2.53968089          | 2.56e-17   | Glutathione S-transferase                    |
| 2599764121                     | -0.9111365          | 0.00245821 | Cu/Zn superoxide dismutase                   |
| 2599762957                     | -3.3502828          | 2.03E-10   | Dyp-type peroxidase family                   |
| 2599765091                     | -2.5725157          | 0.0055855  | Glutathione S-transferase, C-terminal domain |
| <b>In response to host</b>     |                     |            |                                              |
| 2599764292                     | 1.53715362          | 0.0085     | Glutathione S-transferase                    |
