# Supplementary material for: Molecular Dialogues between Early Divergent Fungi and Bacteria in an Antagonism versus a Mutualism
Source: PubMed Central journal article supplement (PMC7482071; doi:10.1128/mbio.02088-20), 2020-09-08
Supplement: mBio.02088-20-st006.pdf [file mBio.02088-20-st006.pdf]

**Table S6. *Mycetohabitans* and *Burkholderia* species and strains used in the OrthoMCL clustering analysis.**

| Organism                                                  | Source                                               | Citation          |
|-----------------------------------------------------------|------------------------------------------------------|-------------------|
| <i>Mycetohabitans rhizoxinica</i> HKI 454                 | <i>Rm</i> ATCC 62417                                 | (1)               |
| <i>Mycetohabitans</i> sp. B13                             | <i>Rm</i> ATCC 52813                                 | This study        |
| <i>Mycetohabitans</i> sp. B14                             | <i>Rm</i> ATCC 52814                                 | This study        |
| <i>B. ambifaria</i> AMMD [LMG 19182]                      | Plant rhizosphere                                    | JGI Genome Portal |
| <i>B. cenocepacia</i> AU1054                              | Blood of cystic fibrosis patient                     | JGI Genome Portal |
| <i>B. cenocepacia</i> J2315                               | Cystic fibrosis patient                              | (2)               |
| <i>Burkholderia</i> sp. GG4                               | Ginger rhizosphere                                   | (3)               |
| <i>B. dolosa</i> AUO158                                   | Causal agent of necrotizing pneumonia                | (4)               |
| <i>B. glumae</i> BGR1                                     | Diseased rice pinacle                                | (5)               |
| <i>B. gladioli</i> BSR3                                   | Diseased rice sheath                                 | (6)               |
| <i>B. mallei</i> ATCC 23344                               | Agent of glanders                                    | (7)               |
| <i>B. mallei</i> NCTC 10247                               | Agent of glanders and pneumonia                      | (8)               |
| <i>B. multivorans</i> ATCC 17616                          | Soil                                                 | (9)               |
| <i>B. phenoliruptrix</i> BR3459a (CLA1)                   | Nitrogen-fixing symbiont of <i>Mimosa flocculosa</i> | (10)              |
| <i>B. phymatum</i> STM815                                 | Root nodule of <i>Machaerium lunatum</i>             | (11)              |
| <i>B. phytofirmans</i> PsJN T                             | Endophyte of onion roots                             | JGI Genome Portal |
| <i>B. pseudomallei</i> BPC006                             | Melioidosis patient                                  | (12)              |
| <i>B. thailandensis</i> E264                              | Non-pathogenic saprophyte                            | (13)              |
| <i>B. vietnamiensis</i> G4                                | Wastewater treatment facility                        | JGI Genome Portal |
| <i>B. xenovorans</i> LB400 (formerly <i>B. fungorum</i> ) | Landfill                                             | JGI Genome Portal |

## References

- Lackner G, Moebius N, Partida-Martinez L, Hertweck C. 2011. Complete genome sequence of *Burkholderia rhizoxinica*, an endosymbiont of *Rhizopus microsporus*. *Journal of Bacteriology* 193:783-784.
- Holden MT, Seth-Smith HM, Crossman LC, Sebaihia M, Bentley SD, Cerdeno-Tarraga AM, Thomson NR, Bason N, Quail MA, Sharp S, Cherevach I, Churcher C, Goodhead I, Hauser H, Holroyd N, Mungall K, Scott P, Walker D, White B, Rose H, Iversen P, Mil-Homens D, Rocha EP, Fialho AM, Baldwin A, Dowson C, Barrell BG, Govan JR, Vandamme P, Hart CA, Mahenthiralingam E, Parkhill J. 2009. The genome of *Burkholderia cenocepacia* J2315, an epidemic pathogen of cystic fibrosis patients. *Journal of Bacteriology* 191:261-277.
- Hong KW, Koh CL, Sam CK, Yin WF, Chan KG. 2012. Complete genome sequence of *Burkholderia* sp. Strain GG4, a betaproteobacterium that reduces 3-oxo-N-acylhomoserine lactones and produces different N-acylhomoserine lactones. *Journal of Bacteriology* 194:6317.
- Johnson SL, Bishop-Lilly KA, Ladner JT, Daligault HE, Davenport KW, Jaissle J, Frey KG, Koroleva GI, Bruce DC, Coyne SR, Broomall SM, Li PE, Teshima H, Gibbons HS, Palacios GF, Rosenzweig CN, Redden CL, Xu Y, Minogue TD, Chain PS. 2015. Complete genome sequences for 59 *Burkholderia* isolates, both pathogenic and near neighbor. *Genome Announcements* 3:e00159-15.
- Lim J, Lee TH, Nahm BH, Choi YD, Kim M, Hwang I. 2009. Complete genome sequence of *Burkholderia glumae* BGR1. *Journal of Bacteriology* 191:3758-3759.
- Seo YS, Lim J, Choi BS, Kim H, Goo E, Lee B, Lim JS, Choi IY, Moon JS, Kim J, Hwang I. 2011. Complete genome sequence of *Burkholderia gladioli* BSR3. *Journal of Bacteriology* 193:3149.

7. Nierman WC, DeShazer D, Kim HS, Tettelin H, Nelson KE, Feldblyum T, Ulrich RL, Ronning CM, Brinkac LM, Daugherty SC, Davidsen TD, Deboy RT, Dimitrov G, Dodson RJ, Durkin AS, Gwinn ML, Haft DH, Khouri H, Kolonay JF, Madupu R, Mohammoud Y, Nelson WC, Radune D, Romero CM, Sarria S, Selengut J, Shamblin C, Sullivan SA, White O, Yu Y, Zafar N, Zhou L, Fraser CM. 2004. Structural flexibility in the *Burkholderia mallei* genome. *Proceedings of the National Academy of Sciences of the United States of America* 101:14246-14251.
8. Daligault HE, Davenport KW, Minogue TD, Bishop-Lilly KA, Broomall SM, Bruce DC, Chain PS, Coyne SR, Frey KG, Gibbons HS, Jaissle J, Koroleva GI, Ladner JT, Lo CC, Munk C, Palacios GF, Redden CL, Rosenzweig CN, Scholz MB, Johnson SL. 2014. Whole-genome assemblies of 56 *Burkholderia* species. *Genome Announcements* 2:e01106-14.
9. Nishiyama E, Ohtsubo Y, Nagata Y, Tsuda M. 2010. Identification of *Burkholderia multivorans* ATCC 17616 genes induced in soil environment by in vivo expression technology. *Environmental Microbiology* 12:2539-2558.
10. de Oliveira Cunha C, Goda Zuleta LF, Paula de Almeida LG, Prioli Ciapina L, Lustrino Borges W, Pitard RM, Baldani JI, Straliootto R, de Faria SM, Hungria M, Sousa Cavada B, Mercante FM, Ribeiro de Vasconcelos AT. 2012. Complete genome sequence of *Burkholderia phenoliruptrix* BR3459a (CLA1), a heat-tolerant, nitrogen-fixing symbiont of *Mimosa flocculosa*. *Journal of Bacteriology* 194:6675-6676.
11. Moulin L, Klonowska A, Caroline B, Booth K, Vriezen JA, Melkonian R, James EK, Young JP, Bena G, Hauser L, Land M, Kyrpides N, Bruce D, Chain P, Copeland A, Pitluck S, Woyke T, Lizotte-Waniewski M, Bristow J, Riley M. 2014. Complete Genome sequence of *Burkholderia phymatum* STM815(T), a broad host range and efficient nitrogen-fixing symbiont of *Mimosa* species. *Standards in Genomic Sciences* 9:763-774.
12. Fang Y, Huang Y, Li Q, Chen H, Yao Z, Pan J, Gu J, Tang B, Wang HG, Yu B, Tong YG, Zou QM, Mao XH. 2012. First genome sequence of a *Burkholderia pseudomallei* isolate in China, strain BPC006, obtained from a melioidosis patient in Hainan. *Journal of Bacteriology* 194:6604-6605.
13. Kim HS, Schell MA, Yu Y, Ulrich RL, Sarria SH, Nierman WC, DeShazer D. 2005. Bacterial genome adaptation to niches: divergence of the potential virulence genes in three *Burkholderia* species of different survival strategies. *BMC Genomics* 6:174.
