# Supplementary material for: Molecular Dialogues between Early Divergent Fungi and Bacteria in an Antagonism versus a Mutualism
Source: PubMed Central journal article supplement (PMC7482071; doi:10.1128/mbio.02088-20), 2020-09-08
Supplement: mBio.02088-20-st007.pdf [file mBio.02088-20-st007.pdf]

**Table S7. *Mycetohabitans* sp. B13 genes encoded exclusively in genomes of endofungal bacteria and upregulated during physical contact with host and non-host fungi.** Annotations provided by JGI Integrated Microbial Genomes and Microbiomes. T3SS signals are predicted by Effective T3 V2.0 (1).

| Protein ID | Annotation                                                                                          | T3SS signal |
|------------|-----------------------------------------------------------------------------------------------------|-------------|
| 2599762710 | Hypothetical protein                                                                                | Present     |
| 2599762721 | Hypothetical protein                                                                                | Absent      |
| 2599762734 | Acetyltransferase (GNAT) family                                                                     | Absent      |
| 2599762742 | Hypothetical protein                                                                                | Present     |
| 2599762754 | Glycosyl hydrolase catalytic core                                                                   | Absent      |
| 2599762763 | Hypothetical protein                                                                                | Present     |
| 2599762840 | Acyl carrier protein                                                                                | Absent      |
| 2599762841 | Acyl-CoA dehydrogenases                                                                             | Absent      |
| 2599762848 | Response regulators consisting of a CheY-like receiver domain and a winged-helix DNA-binding domain | Present     |
| 2599762998 | Glycine zipper                                                                                      | Absent      |
| 2599763016 | Hypothetical protein                                                                                | Present     |
| 2599763051 | Hypothetical protein                                                                                | Present     |
| 2599763251 | Methionyl-tRNA formyltransferase                                                                    | Absent      |
| 2599763268 | Bacterial type III secretion protein (HrpB1_HrpK)                                                   | Absent      |
| 2599763281 | Bacterial type III secretion protein (HrpB2)                                                        | Absent      |
| 2599763289 | Hypothetical protein                                                                                | Absent      |
| 2599763292 | Hypothetical protein                                                                                | Present     |
| 2599763295 | Hypothetical protein                                                                                | Present     |
| 2599763360 | Hypothetical protein                                                                                | Present     |
| 2599763422 | Hypothetical protein                                                                                | Absent      |
| 2599763623 | Leucine Rich repeat                                                                                 | Present     |
| 2599763727 | Conserved hypothetical phage tail region protein                                                    | Absent      |
| 2599764053 | Hypothetical protein                                                                                | Absent      |
| 2599764576 | Hypothetical protein                                                                                | Absent      |
| 2599764986 | Hypothetical protein                                                                                | Absent      |
| 2599765016 | Hypothetical protein                                                                                | Absent      |
| 2599765415 | Hypothetical protein                                                                                | Absent      |
| 2599765428 | Hypothetical protein                                                                                | Present     |
| 2599765431 | <i>Xanthomonas</i> avirulence protein, Avr/PthA                                                     | Present     |
| 2599765635 | Hypothetical protein                                                                                | Absent      |
| 2599765640 | Transglycosylase SLT domain                                                                         | Present     |
| 2599765719 | Hypothetical protein                                                                                | Present     |
| 2599765780 | F-box-like                                                                                          | Present     |
| 2599765789 | O-antigen ligase like membrane protein                                                              | Present     |
| 2599765858 | Transposase domain (DUF772)/Transposase DDE domain                                                  | Absent      |

1. Jehl MA, Arnold R, Rattei T. 2011. Effective—a database of predicted secreted bacterial proteins. *Nucleic Acids Research* 39:D591-D595.
