# Supplementary material for: Molecular Dialogues between Early Divergent Fungi and Bacteria in an Antagonism versus a Mutualism
Source: PubMed Central journal article supplement (PMC7482071; doi:10.1128/mbio.02088-20), 2020-09-08
Supplement: mBio.02088-20-st008.pdf [file mBio.02088-20-st008.pdf]

**Table S8. Mucoromycotina isolates screened for the presence of *Burkholderia*-related endobacteria.**

| Fungal isolate                               | Endobacteria   |
|----------------------------------------------|----------------|
| <i>Absidia glauca</i> CU 84-173              | Absent         |
| <i>Cokeromyces recurvatus</i> CU 95-158      | Absent         |
| <i>Cunninghamella blakesleeana</i> CU 95-022 | Absent         |
| <i>Cunninghamella echinulata</i> CU 92-173   | Absent         |
| <i>Gongronella butleri</i> CU 84-094         | Absent         |
| <i>Mucor circinelloides</i> CU 92-040        | Absent         |
| <i>Mucor circinelloides</i> CBS 277.49       | Absent         |
| <i>Mucor genevensis</i> CU 84-174            | Absent         |
| <i>Mucor hiemalis</i> CU 91-143              | Absent         |
| <i>Mucor racemosus</i> CU 93-008             | Absent         |
| <i>Mycotypha africana</i> CU 92-094          | Absent         |
| <i>Phycomyces blakesleeanus</i> CU 98-005    | Absent         |
| <i>Radiomyces embreei</i> CU 93-126          | Absent         |
| <i>Rhizopus arrhizus</i> NRRL 1469           | Absent         |
| <i>Rhizopus arrhizus</i> NRRL 2582           | Absent         |
| <i>Rhizopus arrhizus</i> NRRL 54538          | Absent         |
| <i>Rhizopus arrhizus</i> NRRL 54539          | Absent         |
| <i>Rhizopus azygosporus</i> DUKE 8560        | Absent         |
| <i>Rhizopus delemar</i> ATCC 36412           | Absent         |
| <i>Rhizopus delemar</i> CNRMA 03.253         | Absent         |
| <i>Rhizopus delemar</i> CNRMA 04.160         | Absent         |
| <i>Rhizopus delemar</i> CBS 389.34           | Absent         |
| <i>Rhizopus delemar</i> FSU 6025             | Absent         |
| <i>Rhizopus delemar</i> NRRL A-21447         | Absent         |
| <i>Rhizopus delemar</i> NRRL 1472            | Absent         |
| <i>Rhizopus delemar</i> NRRL 1705            | Absent         |
| <i>Rhizopus delemar</i> NRRL 3562            | Absent         |
| <i>Rhizopus delemar</i> NRRL 3563            | Absent         |
| <i>Rhizopus homothallicus</i> DUKE 7693      | Absent         |
| <i>Rhizopus microsporus</i> NRRL 5905        | Absent         |
| <i>Rhizopus microsporus</i> NRRL 54029       | Absent         |
| <i>Rhizopus microsporus</i> ATCC 11559       | Absent         |
| <i>Rhizopus microsporus</i> ATCC 52807       | Absent         |
| <i>Rhizopus microsporus</i> ATCC 56018       | Absent         |
| <i>Rhizopus microsporus</i> ATCC 20577       | <b>Present</b> |
| <i>Rhizopus microsporus</i> ATCC 46348       | <b>Present</b> |
| <i>Rhizopus microsporus</i> ATCC 52811       | <b>Present</b> |
| <i>Rhizopus microsporus</i> ATCC 52812       | <b>Present</b> |
| <i>Rhizopus microsporus</i> ATCC 52813       | <b>Present</b> |

| Fungal isolate                             | Endobacteria |
|--------------------------------------------|--------------|
| <i>Rhizopus microsporus</i> ATCC 52814     | Present      |
| <i>Rhizopus microsporus</i> ATCC 56019     | Present      |
| <i>Rhizopus microsporus</i> ATCC 56028     | Present      |
| <i>Rhizopus microsporus</i> ATCC 62417     | Present      |
| <i>Rhizopus oryzae</i> ATCC 11423          | Absent       |
| <i>Rhizopus oryzae</i> ATCC 13440          | Absent       |
| <i>Rhizopus oryzae</i> ATCC 44170          | Absent       |
| <i>Rhizopus oryzae</i> ATCC 56536          | Absent       |
| <i>Rhizopus oryzae</i> FSU 5858            | Absent       |
| <i>Rhizopus oryzae</i> FSU 6020            | Absent       |
| <i>Rhizopus oryzae</i> FSU 6024            | Absent       |
| <i>Rhizopus oryzae</i> NRRL 395            | Absent       |
| <i>Rhizopus oryzae</i> NRRL 1526           | Absent       |
| <i>Rhizopus oryzae</i> NRRL 2871           | Absent       |
| <i>Rhizopus oryzae</i> NRRL 2908           | Absent       |
| <i>Rhizopus oryzae</i> NRRL 6431           | Absent       |
| <i>Rhizopus oryzae</i> NRRL A-21789        | Absent       |
| <i>Rhizopus oryzae</i> CU 99-892           | Absent       |
| <i>Rhizopus sexualis</i> DUKE 7694         | Absent       |
| <i>Rhizopus stolonifer</i> CU 92-208       | Absent       |
| <i>Rhizopus stolonifer</i> 92-RS-5         | Absent       |
| <i>Syncephalastrum racemosum</i> CU 91-132 | Absent       |
| <i>Thamnidium elegans</i> CU 95-083        | Absent       |
| <i>Umbelopsis versiformis</i> CU 91-049    | Absent       |
| <i>Zygorhynchus heterogamous</i> CU 92-287 | Absent       |
