# Supplementary material for: Molecular Dialogues between Early Divergent Fungi and Bacteria in an Antagonism versus a Mutualism
Source: PubMed Central journal article supplement (PMC7482071; doi:10.1128/mbio.02088-20), 2020-09-08
Supplement: mBio.02088-20-st009.pdf [file mBio.02088-20-st009.pdf]

**Table S9. Secondary metabolite gene (SMG) clusters in genomes of Eurotiomycetes (Ascomycota) and Mucoromycotina.** Data obtained from the JGI Mycocosm website (<https://mycocosm.jgi.doe.gov/mycocosm/home>), accessed on 3 June 2020. DMAT, dimethylallyl transferase; NRPS, nonribosomal peptide synthetase; PKS, polyketide synthase; TC, terpene cyclase.

| Genome                                              | DMAT | HYBRID | NRPS | NRPS-Like | PKS | PKS-Like | TC | Total |
|-----------------------------------------------------|------|--------|------|-----------|-----|----------|----|-------|
| <b>EUROTIOMYCETES</b>                               |      |        |      |           |     |          |    |       |
| <i>Arthroderma benhamiae</i> CBS 112371             | 2    | 3      | 14   | 4         | 7   | 2        | 2  | 34    |
| <i>Aspergillus acristatus</i> CBS 119.55 v1.0       | 3    | 2      | 12   | 14        | 31  | 3        | 0  | 65    |
| <i>Aspergillus aculeatinus</i> CBS 121060 v1.0      | 6    | 2      | 19   | 20        | 28  | 3        | 3  | 81    |
| <i>Aspergillus aculeatus</i> ATCC16872 v1.1         | 3    | 4      | 18   | 21        | 19  | 4        | 2  | 71    |
| <i>Aspergillus affinis</i> CBS 129190 v1.0          | 13   | 8      | 13   | 22        | 36  | 3        | 6  | 101   |
| <i>Aspergillus alabamensis</i> v1.0                 | 7    | 4      | 14   | 16        | 21  | 3        | 3  | 68    |
| <i>Aspergillus albertensis</i> v1.0                 | 5    | 2      | 13   | 17        | 38  | 7        | 4  | 86    |
| <i>Aspergillus allahabadii</i> v1.0                 | 10   | 3      | 10   | 19        | 16  | 2        | 1  | 61    |
| <i>Aspergillus alliaceus</i> CBS 536.65 v1.0        | 2    | 2      | 15   | 20        | 37  | 8        | 5  | 89    |
| <i>Aspergillus ambiguus</i> v1.0                    | 8    | 1      | 11   | 18        | 18  | 1        | 2  | 59    |
| <i>Aspergillus amoeneus</i> CBS 111.32 v1.0         | 10   | 3      | 14   | 12        | 19  | 4        | 0  | 62    |
| <i>Aspergillus amylovorus</i> CBS 600.67 v1.0       | 2    | 3      | 11   | 9         | 27  | 2        | 6  | 60    |
| <i>Aspergillus arachidicola</i> v1.0                | 10   | 3      | 18   | 13        | 18  | 5        | 3  | 70    |
| <i>Aspergillus arxii</i> CBS 52583 v1.0             | 1    | 1      | 4    | 10        | 11  | 2        | 0  | 29    |
| <i>Aspergillus assulatus</i> CBS 27911 v1.0         | 2    | 1      | 4    | 7         | 9   | 2        | 4  | 29    |
| <i>Aspergillus astellatus</i> v1.0                  | 3    | 6      | 12   | 15        | 29  | 6        | 5  | 76    |
| <i>Aspergillus aurantiobrunneus</i> CBS 465.65 v1.0 | 6    | 1      | 10   | 14        | 20  | 3        | 6  | 60    |
| <i>Aspergillus aureofulgens</i> IBT 27100 v1.0      | 11   | 0      | 12   | 18        | 13  | 2        | 1  | 57    |
| <i>Aspergillus aureolatus</i> CBS 190.65 v1.0       | 7    | 3      | 15   | 6         | 36  | 5        | 3  | 75    |
| <i>Aspergillus aureoluteus</i> CBS 105.55 v1.0      | 5    | 2      | 6    | 8         | 9   | 3        | 3  | 36    |
| <i>Aspergillus aureoterreus</i> v1.0                | 8    | 2      | 14   | 14        | 17  | 3        | 6  | 64    |
| <i>Aspergillus avenaceus</i> IBT 18842 v1.0         | 1    | 4      | 11   | 18        | 18  | 4        | 6  | 62    |
| <i>Aspergillus bertholletius</i> IBT 29228 v1.0     | 6    | 5      | 11   | 10        | 22  | 5        | 6  | 65    |
| <i>Aspergillus biplanus</i> CBS 468.65 v1.0         | 5    | 1      | 11   | 19        | 34  | 6        | 7  | 83    |
| <i>Aspergillus bisporus</i> CBS 707.71 v1.0         | 2    | 1      | 8    | 12        | 12  | 4        | 2  | 41    |
| <i>Aspergillus bombycis</i> NRRL 26010              | 7    | 4      | 18   | 18        | 22  | 9        | 5  | 83    |
| <i>Aspergillus botucatensis</i> CBS 114221 v1.0     | 10   | 2      | 14   | 8         | 16  | 4        | 1  | 55    |
| <i>Aspergillus brasiliensis</i> v1.0                | 2    | 5      | 11   | 17        | 29  | 6        | 3  | 73    |
| <i>Aspergillus brevijanensis</i> CBS 111.46 v1.0    | 10   | 3      | 20   | 23        | 39  | 3        | 4  | 102   |
| <i>Aspergillus brevipes</i> CBS 118.53 v1.0         | 4    | 3      | 8    | 18        | 19  | 3        | 2  | 57    |
| <i>Aspergillus brunneoviolaceus</i> CBS 621.78 v1.0 | 4    | 2      | 21   | 21        | 24  | 3        | 4  | 79    |
| <i>Aspergillus caelatus</i> CBS 763.97 v1.0         | 8    | 4      | 16   | 20        | 22  | 8        | 5  | 83    |
| <i>Aspergillus calidoustus</i>                      | 7    | 1      | 9    | 13        | 28  | 2        | 6  | 66    |

| Genome                                            | DMAT | HYBRID | NRPS | NRPS-Like | PKS | PKS-Like | TC | Total |
|---------------------------------------------------|------|--------|------|-----------|-----|----------|----|-------|
| <i>Aspergillus californicus</i> CBS 123895 v1.0   | 8    | 5      | 19   | 16        | 29  | 4        | 6  | 87    |
| <i>Aspergillus campestris</i> IBT 28561 v1.0      | 5    | 5      | 11   | 11        | 12  | 2        | 2  | 48    |
| <i>Aspergillus candidus</i> CBS 102.13 v1.0       | 4    | 4      | 11   | 6         | 16  | 3        | 1  | 45    |
| <i>Aspergillus caninus</i> CBS 128032 v1.0        | 0    | 0      | 3    | 3         | 9   | 2        | 0  | 17    |
| <i>Aspergillus capensis</i> CBS 138188 v1.0       | 6    | 3      | 20   | 18        | 13  | 3        | 5  | 68    |
| <i>Aspergillus carbonarius</i> ITEM 5010 v3       | 2    | 5      | 11   | 20        | 18  | 4        | 4  | 64    |
| <i>Aspergillus carlsbadensis</i> CBS 123894 v1.0  | 5    | 2      | 9    | 16        | 26  | 3        | 7  | 68    |
| <i>Aspergillus cervinus</i> CBS 196.64 v1.0       | 3    | 1      | 16   | 10        | 24  | 5        | 4  | 63    |
| <i>Aspergillus chevalieri</i> CBS 522.65 v1.0     | 2    | 1      | 3    | 10        | 13  | 2        | 0  | 31    |
| <i>Aspergillus chrysellus</i> CBS 472.65 v1.0     | 7    | 11     | 14   | 26        | 38  | 5        | 4  | 105   |
| <i>Aspergillus clavatonanicus</i> v1.0            | 4    | 4      | 11   | 7         | 15  | 3        | 3  | 47    |
| <i>Aspergillus clavatus</i> NRRL 1 from AspGD     | 3    | 4      | 10   | 5         | 16  | 3        | 4  | 45    |
| <i>Aspergillus cleistominutus</i> CBS 200.75 v1.0 | 6    | 2      | 15   | 14        | 27  | 2        | 3  | 69    |
| <i>Aspergillus coreanus</i> CBS 117059 v1.0       | 8    | 1      | 11   | 10        | 14  | 2        | 1  | 47    |
| <i>Aspergillus coremiiformis</i> CBS 553.77 v1.0  | 5    | 0      | 6    | 8         | 15  | 2        | 2  | 38    |
| <i>Aspergillus costaricaensis</i> CBS 115574 v1.0 | 3    | 5      | 17   | 21        | 32  | 7        | 7  | 92    |
| <i>Aspergillus costiformis</i> CBS 101749 v1.0    | 2    | 0      | 5    | 10        | 11  | 2        | 0  | 30    |
| <i>Aspergillus creber</i> IBT 32277 v1.0          | 9    | 4      | 17   | 11        | 21  | 4        | 1  | 67    |
| <i>Aspergillus cretensis</i> CBS 112802 v1.0      | 12   | 10     | 14   | 21        | 31  | 6        | 4  | 98    |
| <i>Aspergillus cristatus</i> GZAAS20.1005         | 1    | 0      | 5    | 13        | 11  | 2        | 1  | 33    |
| <i>Aspergillus crustosus</i> CBS 478.65 v1.0      | 7    | 0      | 7    | 11        | 18  | 3        | 3  | 49    |
| <i>Aspergillus cumulatus</i> DTO 311-F5 v1.0      | 2    | 0      | 4    | 9         | 9   | 4        | 0  | 28    |
| <i>Aspergillus dentatus</i> CBS 114.63 v1.0       | 6    | 2      | 10   | 16        | 24  | 5        | 1  | 64    |
| <i>Aspergillus desertorum</i> CBS 653.73 v1.0     | 4    | 3      | 7    | 12        | 20  | 9        | 5  | 60    |
| <i>Aspergillus dromiae</i> CBS 140633 v1.0        | 5    | 2      | 8    | 14        | 35  | 3        | 6  | 73    |
| <i>Aspergillus duricaulis</i> CBS 481.65 v1.0     | 7    | 2      | 4    | 10        | 24  | 2        | 4  | 53    |
| <i>Aspergillus egyptiacus</i> CBS 656.73 v1.0     | 4    | 0      | 16   | 8         | 19  | 4        | 4  | 55    |
| <i>Aspergillus elegans</i> CBS 116.39 v1.0        | 8    | 8      | 17   | 26        | 27  | 3        | 5  | 94    |
| <i>Aspergillus ellipticus</i> CBS 707.79 v1.0     | 2    | 2      | 15   | 14        | 28  | 7        | 4  | 72    |
| <i>Aspergillus eucalypticola</i> CBS 122712 v1.0  | 2    | 6      | 11   | 19        | 26  | 4        | 6  | 74    |
| <i>Aspergillus falconensis</i> CBS 271.91 v1.0    | 5    | 2      | 12   | 13        | 33  | 5        | 2  | 72    |
| <i>Aspergillus ferenczii</i> CBS 121594 v1.0      | 2    | 2      | 7    | 9         | 12  | 2        | 3  | 37    |
| <i>Aspergillus fijiensis</i> CBS 313.89 v1.0      | 5    | 3      | 21   | 25        | 26  | 3        | 4  | 87    |
| <i>Aspergillus filifera</i> CBS 114510 v1.0       | 5    | 1      | 10   | 13        | 30  | 3        | 3  | 65    |
| <i>Aspergillus flavipes</i> CBS 22552 v1.0        | 7    | 3      | 19   | 26        | 28  | 6        | 3  | 92    |
| <i>Aspergillus flavus</i> NRRL3357                | 10   | 1      | 16   | 16        | 20  | 7        | 3  | 73    |
| <i>Aspergillus floccosus</i> CBS 116.37 v1.0      | 10   | 5      | 19   | 23        | 26  | 3        | 3  | 89    |

| Genome                                             | DMAT | HYBRID | NRPS | NRPS-Like | PKS | PKS-Like | TC | Total |
|----------------------------------------------------|------|--------|------|-----------|-----|----------|----|-------|
| <i>Aspergillus flocculosus</i> v1.0                | 8    | 5      | 18   | 24        | 28  | 2        | 4  | 89    |
| <i>Aspergillus floridensis</i> DTO 198-A8 v1.0     | 4    | 1      | 16   | 21        | 23  | 4        | 3  | 72    |
| <i>Aspergillus foveolata</i> CBS 279.81 v1.0       | 5    | 2      | 8    | 17        | 29  | 4        | 3  | 68    |
| <i>Aspergillus frequens</i> CBS 586.65 v1.0        | 8    | 2      | 13   | 24        | 16  | 2        | 4  | 69    |
| <i>Aspergillus fructiculosus</i> v1.0              | 5    | 2      | 10   | 14        | 38  | 2        | 2  | 73    |
| <i>Aspergillus fumigatiaffinis</i> CBS 117186 v1.0 | 7    | 2      | 19   | 12        | 23  | 3        | 3  | 69    |
| <i>Aspergillus fumigatus</i> A1163                 | 3    | 2      | 8    | 6         | 11  | 2        | 0  | 32    |
| <i>Aspergillus fumigatus</i> Af293 from AspGD      | 2    | 0      | 9    | 7         | 14  | 2        | 0  | 34    |
| <i>Aspergillus fumisynnematus</i> IBT 28474 v1.0   | 8    | 2      | 13   | 10        | 20  | 4        | 2  | 59    |
| <i>Aspergillus funiculosus</i> CBS 116.56 v1.0     | 5    | 0      | 5    | 5         | 15  | 2        | 3  | 35    |
| <i>Aspergillus galapagensis</i> CBS 117522 v1.0    | 3    | 2      | 9    | 9         | 12  | 2        | 2  | 39    |
| <i>Aspergillus germanicus</i> CBS 123887 v1.0      | 5    | 0      | 10   | 16        | 24  | 3        | 7  | 65    |
| <i>Aspergillus giganteus</i> CBS 515.65 v1.0       | 3    | 3      | 12   | 7         | 18  | 3        | 2  | 48    |
| <i>Aspergillus glaucus</i> v1.0                    | 1    | 0      | 6    | 11        | 13  | 3        | 0  | 34    |
| <i>Aspergillus granulosis</i> CBS 588.65 v1.0      | 8    | 0      | 8    | 13        | 22  | 2        | 5  | 58    |
| <i>Aspergillus haitiensis</i> CBS 468.91 v1.0      | 3    | 0      | 6    | 10        | 29  | 3        | 8  | 59    |
| <i>Aspergillus heteromorphus</i> CBS 117.55 v1.0   | 4    | 3      | 12   | 16        | 16  | 3        | 3  | 57    |
| <i>Aspergillus heterothallicus</i> CBS 489.65 v1.0 | 4    | 0      | 9    | 16        | 15  | 4        | 4  | 52    |
| <i>Aspergillus hiratsukae</i> CBS 294.93 v1.0      | 4    | 2      | 10   | 9         | 10  | 3        | 2  | 40    |
| <i>Aspergillus homomorphus</i> CBS 101889 v1.0     | 4    | 3      | 16   | 22        | 24  | 5        | 4  | 78    |
| <i>Aspergillus ibericus</i> CBS 121593 v1.0        | 2    | 6      | 7    | 18        | 15  | 6        | 3  | 57    |
| <i>Aspergillus igneus</i> CBS 466.65 v1.0          | 5    | 4      | 13   | 10        | 23  | 2        | 1  | 58    |
| <i>Aspergillus iizukae</i> CBS 541.69 v1.0         | 7    | 4      | 18   | 22        | 16  | 3        | 3  | 73    |
| <i>Aspergillus implicatus</i> CBS 484.95 v1.0      | 3    | 4      | 13   | 18        | 49  | 5        | 8  | 100   |
| <i>Aspergillus indicus</i> v2.0                    | 7    | 2      | 10   | 14        | 29  | 2        | 2  | 66    |
| <i>Aspergillus indologenus</i> CBS 114.80 v1.0     | 6    | 5      | 17   | 24        | 27  | 3        | 2  | 84    |
| <i>Aspergillus insolitus</i> CBS 384.61 v1.0       | 0    | 1      | 9    | 7         | 9   | 2        | 1  | 29    |
| <i>Aspergillus insuetus</i> CBS 107.25 v1.0        | 5    | 1      | 8    | 17        | 27  | 2        | 6  | 66    |
| <i>Aspergillus japonicus</i> CBS 114.51 v1.0       | 4    | 1      | 21   | 22        | 19  | 3        | 1  | 71    |
| <i>Aspergillus karnatakaensis</i> CBS 102800 v1.0  | 11   | 3      | 12   | 19        | 29  | 5        | 2  | 81    |
| <i>Aspergillus kawachii</i> IFO 4308               | 2    | 6      | 15   | 17        | 33  | 5        | 6  | 84    |
| <i>Aspergillus keveii</i> CBS 209.92 v1.0          | 8    | 0      | 11   | 17        | 25  | 3        | 8  | 72    |
| <i>Aspergillus laciniosus</i> CBS 117721 v1.0      | 9    | 2      | 16   | 11        | 15  | 5        | 1  | 59    |
| <i>Aspergillus lentulus</i> CBS 117885 v1.0        | 6    | 2      | 12   | 9         | 18  | 3        | 2  | 52    |
| <i>Aspergillus leporis</i> CBS 151.66 v1.0         | 8    | 6      | 17   | 23        | 25  | 4        | 3  | 86    |
| <i>Aspergillus longivesica</i> v1.0                | 3    | 4      | 12   | 8         | 10  | 5        | 2  | 44    |

| Genome                                                          | DMAT | HYBRID | NRPS | NRPS-Like | PKS | PKS-Like | TC | Total |
|-----------------------------------------------------------------|------|--------|------|-----------|-----|----------|----|-------|
| <i>Aspergillus luchuensis</i> CBS 106.47 v1.0                   | 2    | 6      | 16   | 22        | 30  | 5        | 6  | 87    |
| <i>Aspergillus lucknowensis</i> CBS 449.75 v1.0                 | 3    | 3      | 7    | 6         | 23  | 5        | 3  | 50    |
| <i>Aspergillus luppii</i> CBS 653.74 v1.0                       | 10   | 0      | 14   | 19        | 12  | 3        | 1  | 59    |
| <i>Aspergillus microcysticus</i> CBS 120.58 v1.0                | 0    | 2      | 8    | 14        | 13  | 2        | 1  | 40    |
| <i>Aspergillus minisclerotigenes</i> CBS 117635 v1.0            | 11   | 1      | 16   | 18        | 26  | 7        | 4  | 83    |
| <i>Aspergillus miraensis</i> CBS 140625 v1.0                    | 5    | 3      | 7    | 13        | 34  | 4        | 4  | 70    |
| <i>Aspergillus multicolor</i> v1.0                              | 4    | 3      | 10   | 17        | 28  | 5        | 2  | 69    |
| <i>Aspergillus multiplicatus</i> CBS 646958 v1.0                | 2    | 1      | 4    | 8         | 6   | 3        | 3  | 27    |
| <i>Aspergillus muricatus</i> v1.0                               | 8    | 3      | 14   | 22        | 29  | 3        | 4  | 83    |
| <i>Aspergillus nakazawae</i> v1.0                               | 9    | 3      | 10   | 25        | 33  | 3        | 7  | 90    |
| <i>Aspergillus navahoensis</i> v1.0                             | 4    | 2      | 11   | 17        | 33  | 5        | 2  | 74    |
| <i>Aspergillus neoauricomus</i> CBS112787 v1.0                  | 6    | 5      | 10   | 23        | 33  | 3        | 4  | 84    |
| <i>Aspergillus neoconicus</i> CBS 233.90 v1.0                   | 1    | 0      | 7    | 8         | 8   | 3        | 0  | 27    |
| <i>Aspergillus neoechinulatus</i> CBS120.55 v1.0                | 4    | 0      | 9    | 11        | 28  | 3        | 2  | 57    |
| <i>Aspergillus neoflavipes</i> CBS 260.73 v1.0                  | 9    | 3      | 19   | 25        | 18  | 2        | 3  | 79    |
| <i>Aspergillus neoindicus</i> CBS 444.75 v1.0                   | 8    | 2      | 17   | 19        | 20  | 3        | 2  | 71    |
| <i>Aspergillus neoniger</i> CBS 115656 v1.0                     | 3    | 4      | 13   | 16        | 29  | 6        | 9  | 80    |
| <i>Aspergillus neowarcupii</i> IBT 29024 v1.0                   | 3    | 1      | 10   | 13        | 21  | 2        | 3  | 53    |
| <i>Aspergillus nidulans</i>                                     | 5    | 1      | 9    | 13        | 22  | 5        | 1  | 56    |
| <i>Aspergillus niger</i> (lacticoffeatus) CBS 101883 v1.0       | 2    | 9      | 16   | 16        | 23  | 6        | 7  | 79    |
| <i>Aspergillus niger</i> (phoenicis Corda) Thom ATCC 13157 v1.0 | 2    | 9      | 15   | 18        | 26  | 5        | 6  | 81    |
| <i>Aspergillus niger</i> ATCC 1015 v4.0                         | 2    | 9      | 16   | 16        | 27  | 4        | 6  | 80    |
| <i>Aspergillus niger</i> CBS 513.88                             | 2    | 6      | 14   | 15        | 29  | 5        | 6  | 77    |
| <i>Aspergillus niger</i> NRRL3                                  | 2    | 9      | 16   | 16        | 29  | 4        | 6  | 82    |
| <i>Aspergillus niger</i> van Tieghem ATCC 13496 v1.0            | 2    | 8      | 15   | 14        | 29  | 4        | 7  | 79    |
| <i>Aspergillus nishimurae</i> IFM 54133 v1.0                    | 2    | 1      | 2    | 9         | 6   | 3        | 3  | 26    |
| <i>Aspergillus nomius</i> IBT 12657 v1.0                        | 7    | 1      | 16   | 18        | 24  | 6        | 3  | 75    |
| <i>Aspergillus nomius</i> NRRL 13137                            | 5    | 3      | 19   | 19        | 26  | 5        | 4  | 81    |
| <i>Aspergillus novofumigatus</i> IBT 16806 v1.0                 | 4    | 3      | 16   | 5         | 24  | 2        | 2  | 56    |
| <i>Aspergillus novoparasiticus</i> CBS 126849 v1.0              | 8    | 1      | 16   | 18        | 25  | 6        | 3  | 77    |
| <i>Aspergillus nutans</i> CBS 121.56 v1.0                       | 3    | 2      | 27   | 15        | 15  | 4        | 2  | 68    |
| <i>Aspergillus ochraceoroseus</i> IBT 24754 v1.0                | 4    | 2      | 6    | 3         | 10  | 2        | 1  | 28    |
| <i>Aspergillus ochraceoroseus</i> SRRC1432                      | 4    | 1      | 6    | 4         | 9   | 3        | 1  | 28    |
| <i>Aspergillus oerlinghausenensis</i> CBS 139183 v1.0           | 7    | 0      | 10   | 7         | 12  | 2        | 0  | 38    |
| <i>Aspergillus olivicola</i> v1.0                               | 5    | 2      | 7    | 12        | 29  | 4        | 3  | 62    |

| Genome                                                          | DMAT | HYBRID | NRPS | NRPS-Like | PKS | PKS-Like | TC | Total |
|-----------------------------------------------------------------|------|--------|------|-----------|-----|----------|----|-------|
| <i>Aspergillus oryzae</i> RIB40                                 | 9    | 2      | 14   | 15        | 23  | 5        | 2  | 70    |
| <i>Aspergillus ostianus</i> v1.0                                | 8    | 4      | 12   | 17        | 34  | 4        | 4  | 83    |
| <i>Aspergillus paleaceus</i> CBS 498.65 v1.0                    | 2    | 0      | 7    | 7         | 8   | 3        | 1  | 28    |
| <i>Aspergillus papuensis</i> CBS 841.96 v1.0                    | 4    | 2      | 6    | 10        | 10  | 1        | 3  | 36    |
| <i>Aspergillus parasiticus</i> CBS 117618 v1.0                  | 11   | 0      | 22   | 17        | 26  | 6        | 5  | 87    |
| <i>Aspergillus parvisclerotigenus</i> CBS 121.62 v1.0           | 8    | 4      | 14   | 14        | 20  | 5        | 3  | 68    |
| <i>Aspergillus parvulus</i> CBS 136.61 v1.0                     | 5    | 2      | 18   | 14        | 18  | 6        | 1  | 64    |
| <i>Aspergillus penicilloides</i> CBS 540.65 v1.0                | 1    | 1      | 6    | 6         | 11  | 3        | 0  | 28    |
| <i>Aspergillus pernambucoensis</i> CBS 137449 v1.0              | 5    | 0      | 7    | 10        | 6   | 2        | 2  | 32    |
| <i>Aspergillus persii</i> CBS 112795 v1.0                       | 6    | 10     | 16   | 24        | 43  | 4        | 3  | 106   |
| <i>Aspergillus petrakii</i> CBS 105.57 v1.0                     | 7    | 4      | 13   | 20        | 35  | 3        | 4  | 86    |
| <i>Aspergillus piperis</i> CBS 112811 v1.0                      | 2    | 6      | 14   | 20        | 30  | 5        | 8  | 85    |
| <i>Aspergillus primulinus</i> CBS 253.94 v1.0                   | 2    | 0      | 6    | 9         | 7   | 3        | 1  | 28    |
| <i>Aspergillus pseudocaelatus</i> CBS 117616 v1.0               | 8    | 3      | 15   | 18        | 18  | 10       | 4  | 76    |
| <i>Aspergillus pseudodeflectus</i> v1.0                         | 5    | 1      | 9    | 15        | 26  | 4        | 6  | 66    |
| <i>Aspergillus pseudofelis</i> IBT 34107 v1.0                   | 7    | 3      | 19   | 11        | 30  | 2        | 3  | 75    |
| <i>Aspergillus pseudonomius</i> CBS 119388 v1.0                 | 6    | 1      | 17   | 19        | 23  | 6        | 3  | 75    |
| <i>Aspergillus pseudotamarii</i> CBS 117625 v1.0                | 7    | 5      | 16   | 19        | 24  | 7        | 4  | 82    |
| <i>Aspergillus pseudoterreus</i> DTO 47-E6 v1.0                 | 8    | 5      | 11   | 16        | 23  | 2        | 2  | 67    |
| <i>Aspergillus pseudoustus</i> CBS 123904 v1.0                  | 6    | 0      | 15   | 14        | 26  | 3        | 4  | 68    |
| <i>Aspergillus pseudoviridinutans</i> IBT 34175 v1.0            | 7    | 1      | 18   | 13        | 28  | 5        | 2  | 74    |
| <i>Aspergillus pulvericola</i> CBS 137327 v1.0                  | 10   | 6      | 13   | 25        | 34  | 3        | 4  | 95    |
| <i>Aspergillus puulaauensis</i> IBT 32284 v1.0                  | 9    | 3      | 12   | 15        | 22  | 3        | 1  | 65    |
| <i>Aspergillus quadrilineatus</i> (floriformis) CBS 937.73 v1.0 | 3    | 2      | 9    | 13        | 34  | 8        | 2  | 71    |
| <i>Aspergillus quadrilineatus</i> (gemmatus) CBS 853.96 v1.0    | 3    | 3      | 11   | 16        | 29  | 6        | 3  | 71    |
| <i>Aspergillus rambellii</i> 100887 v1.0                        | 3    | 2      | 6    | 4         | 11  | 2        | 1  | 29    |
| <i>Aspergillus rambellii</i> SRRC1468                           | 3    | 1      | 8    | 4         | 11  | 3        | 1  | 31    |
| <i>Aspergillus recurvatus</i> v1.0                              | 5    | 2      | 8    | 12        | 31  | 6        | 2  | 66    |
| <i>Aspergillus restrictus</i> CBS 118.33 v1.0                   | 0    | 1      | 4    | 9         | 6   | 2        | 0  | 22    |
| <i>Aspergillus rhizopodus</i> v1.0                              | 4    | 4      | 14   | 6         | 18  | 4        | 3  | 53    |
| <i>Aspergillus robustus</i> CBS 428.77 v1.0                     | 2    | 4      | 20   | 16        | 19  | 4        | 5  | 70    |
| <i>Aspergillus roseoglobulosus</i> CBS112800 v1.0               | 8    | 6      | 16   | 27        | 34  | 4        | 8  | 103   |
| <i>Aspergillus saccharolyticus</i> JOP 1030-1 v1.0              | 3    | 2      | 14   | 15        | 11  | 6        | 0  | 51    |
| <i>Aspergillus sclerotiicarbonarius</i> CBS 121057 v1.0         | 3    | 6      | 14   | 22        | 25  | 6        | 3  | 79    |

| Genome                                              | DMAT | HYBRID | NRPS | NRPS-Like | PKS | PKS-Like | TC | Total |
|-----------------------------------------------------|------|--------|------|-----------|-----|----------|----|-------|
| <i>Aspergillus sclerotioniger</i> CBS115572 v1.0    | 3    | 5      | 9    | 21        | 21  | 5        | 5  | 69    |
| <i>Aspergillus sclerotiorum</i> CBS 549.65 v1.0     | 6    | 11     | 14   | 24        | 38  | 4        | 4  | 101   |
| <i>Aspergillus sepultus</i> CBS 257.85 v1.0         | 0    | 2      | 12   | 16        | 27  | 3        | 4  | 64    |
| <i>Aspergillus sergii</i> CBS 130017 v1.0           | 9    | 0      | 16   | 22        | 26  | 7        | 3  | 83    |
| <i>Aspergillus sesamicola</i> CBS 137324 v1.0       | 8    | 3      | 13   | 23        | 31  | 4        | 2  | 84    |
| <i>Aspergillus shendaweeii</i> IBT 34197 v1.0       | 4    | 0      | 7    | 8         | 8   | 4        | 4  | 35    |
| <i>Aspergillus siamensis</i> CBS 137452 v1.0        | 4    | 1      | 17   | 11        | 19  | 4        | 2  | 58    |
| <i>Aspergillus silvaticus</i> CBS 128.55 v1.0       | 6    | 4      | 8    | 10        | 21  | 5        | 2  | 56    |
| <i>Aspergillus similis</i> v1.0                     | 5    | 3      | 8    | 15        | 22  | 6        | 2  | 61    |
| <i>Aspergillus spathulatus</i> CBS 408.89 v1.0      | 3    | 1      | 2    | 10        | 6   | 2        | 3  | 27    |
| <i>Aspergillus spectabilis</i> CBS 429.77A v1.0     | 6    | 1      | 13   | 20        | 36  | 4        | 3  | 83    |
| <i>Aspergillus spinosus</i> CBS 483.65 v1.0         | 10   | 2      | 12   | 8         | 14  | 4        | 2  | 52    |
| <i>Aspergillus stella-maris</i> CBS 113639 v1.0     | 5    | 1      | 10   | 13        | 36  | 3        | 5  | 73    |
| <i>Aspergillus stercoraria</i> CBS 428.93 v1.0      | 4    | 1      | 7    | 11        | 26  | 4        | 4  | 57    |
| <i>Aspergillus steynii</i> IBT 23096 v1.0           | 9    | 9      | 17   | 22        | 29  | 3        | 4  | 93    |
| <i>Aspergillus subauricomus</i> CBS 638.78 v1.0     | 7    | 4      | 18   | 20        | 34  | 3        | 7  | 93    |
| <i>Aspergillus sublatus</i> IBT 19356 v1.0          | 4    | 1      | 10   | 13        | 28  | 4        | 3  | 63    |
| <i>Aspergillus subramanianii</i> CBS 138230 v1.0    | 6    | 10     | 14   | 22        | 48  | 4        | 5  | 109   |
| <i>Aspergillus sulphureus</i> CBS 550.65 v1.0       | 8    | 9      | 17   | 23        | 36  | 4        | 6  | 103   |
| <i>Aspergillus sydowii</i> CBS 593.65 v1.0          | 7    | 2      | 13   | 11        | 17  | 2        | 0  | 52    |
| <i>Aspergillus taichungensis</i> IBT 19404 v1.0     | 5    | 3      | 10   | 9         | 11  | 4        | 1  | 43    |
| <i>Aspergillus tamarii</i> CBS 117626 v1.0          | 11   | 3      | 19   | 18        | 22  | 6        | 2  | 81    |
| <i>Aspergillus tanneri</i> DTO 303-18 v1.0          | 7    | 9      | 23   | 12        | 41  | 5        | 4  | 101   |
| <i>Aspergillus templicola</i> CBS 138181 v1.0       | 9    | 2      | 17   | 21        | 20  | 5        | 2  | 76    |
| <i>Aspergillus tennesseensis</i> IBT 32283 v1.0     | 7    | 2      | 10   | 13        | 22  | 4        | 1  | 59    |
| <i>Aspergillus terreus</i> NIH 2624                 | 5    | 1      | 15   | 17        | 24  | 2        | 2  | 66    |
| <i>Aspergillus tetrazonus</i> CBS 591.65A v1.0      | 4    | 1      | 11   | 14        | 28  | 7        | 2  | 67    |
| <i>Aspergillus thermomutatus</i> v1.0               | 4    | 4      | 9    | 10        | 19  | 3        | 3  | 52    |
| <i>Aspergillus thesauricus</i> IBT 34227 v1.0       | 6    | 1      | 7    | 15        | 21  | 2        | 6  | 58    |
| <i>Aspergillus transcarchaticus</i> CBS 423.68 v1.0 | 4    | 0      | 19   | 10        | 17  | 5        | 5  | 60    |
| <i>Aspergillus transmontanensis</i> CBS 130015 v1.0 | 12   | 2      | 14   | 16        | 28  | 5        | 3  | 80    |
| <i>Aspergillus trinidadensis</i> IBT 32571 v1.0     | 5    | 1      | 17   | 25        | 22  | 3        | 1  | 74    |
| <i>Aspergillus triticus</i> CBS266.81 v1.0          | 5    | 2      | 11   | 7         | 23  | 2        | 2  | 52    |
| <i>Aspergillus tsurutae</i> IBT 34206 v1.0          | 3    | 0      | 7    | 7         | 10  | 3        | 1  | 31    |
| <i>Aspergillus tubingensis</i> v1.0                 | 2    | 7      | 14   | 19        | 31  | 6        | 6  | 85    |

| Genome                                            | DMAT | HYBRID | NRPS | NRPS-Like | PKS | PKS-Like | TC | Total |
|---------------------------------------------------|------|--------|------|-----------|-----|----------|----|-------|
| <i>Aspergillus turcosus</i> IBT 27921 v1.0        | 3    | 2      | 11   | 11        | 12  | 3        | 2  | 44    |
| <i>Aspergillus udagawae</i> IFM 46973             | 5    | 3      | 13   | 10        | 25  | 3        | 3  | 62    |
| <i>Aspergillus undulatus</i> CBS 261.88 v1.0      | 5    | 1      | 6    | 15        | 21  | 3        | 3  | 54    |
| <i>Aspergillus unguis</i> CBS132.55 v1.0          | 1    | 2      | 9    | 15        | 13  | 2        | 1  | 43    |
| <i>Aspergillus uvarum</i> CBS 121591 v1.0         | 4    | 3      | 17   | 21        | 21  | 3        | 2  | 71    |
| <i>Aspergillus vadensis</i> CBS 113365 v1.0       | 2    | 5      | 13   | 22        | 27  | 5        | 4  | 78    |
| <i>Aspergillus varians</i> CBS 505.65 v1.0        | 9    | 1      | 11   | 10        | 17  | 3        | 2  | 53    |
| <i>Aspergillus venezuelensis</i> CBS 868.97 v1.0  | 7    | 1      | 13   | 12        | 37  | 4        | 3  | 77    |
| <i>Aspergillus versicolor</i> v1.0                | 6    | 2      | 15   | 13        | 22  | 4        | 1  | 63    |
| <i>Aspergillus violaceofuscus</i> CBS 115571 v1.0 | 6    | 3      | 19   | 20        | 17  | 4        | 3  | 72    |
| <i>Aspergillus viridinutans</i> CBS 127.56 v1.0   | 6    | 2      | 10   | 9         | 21  | 3        | 5  | 56    |
| <i>Aspergillus waksmanii</i> IBT 31900 v1.0       | 2    | 2      | 8    | 8         | 11  | 2        | 3  | 36    |
| <i>Aspergillus welwitschiae</i> CBS139.54b v1.0   | 2    | 7      | 15   | 20        | 26  | 4        | 7  | 81    |
| <i>Aspergillus wentii</i> v1.0                    | 2    | 3      | 12   | 14        | 20  | 2        | 5  | 58    |
| <i>Aspergillus westerdijkiae</i> CBS 112803 v1.0  | 10   | 5      | 16   | 22        | 30  | 5        | 6  | 94    |
| <i>Aspergillus westlandensis</i> CBS 123905 v1.0  | 7    | 5      | 12   | 24        | 27  | 4        | 7  | 86    |
| <i>Aspergillus zonatus</i> v1.0                   | 1    | 0      | 6    | 8         | 12  | 3        | 2  | 32    |
| <i>Blastomyces dermatitidis</i> SLH14081          | 2    | 0      | 4    | 4         | 1   | 2        | 0  | 13    |
| <i>Bysochlamys spectabilis</i> No. 5              | 2    | 1      | 3    | 10        | 5   | 2        | 3  | 26    |
| <i>Caliciopsis orientalis</i>                     | 0    | 1      | 6    | 10        | 11  | 3        | 0  | 31    |
| <i>Capronia coronata</i> CBS 617.96               | 0    | 0      | 3    | 3         | 2   | 3        | 0  | 11    |
| <i>Capronia epimyces</i> CBS 606.96               | 0    | 0      | 2    | 7         | 6   | 2        | 0  | 17    |
| <i>Capronia fungicola</i> CBS 614.96 v1.0         | 0    | 0      | 3    | 6         | 4   | 2        | 0  | 15    |
| <i>Capronia semiimmersa</i> CBS27337              | 0    | 0      | 4    | 5         | 3   | 2        | 0  | 14    |
| <i>Cladophialophora bantiana</i> CBS 173.52       | 1    | 0      | 2    | 8         | 2   | 3        | 0  | 16    |
| <i>Cladophialophora carrionii</i> CBS 160.54      | 0    | 0      | 3    | 4         | 4   | 2        | 1  | 14    |
| <i>Cladophialophora immunda</i> CBS83496          | 0    | 0      | 2    | 6         | 5   | 2        | 0  | 15    |
| <i>Cladophialophora psammophila</i> CBS 110553    | 0    | 0      | 2    | 10        | 2   | 2        | 0  | 16    |
| <i>Cladophialophora yegresii</i> CBS 114405       | 0    | 0      | 1    | 4         | 2   | 2        | 1  | 10    |
| <i>Coccidioides immitis</i> RS                    | 0    | 1      | 5    | 4         | 7   | 3        | 1  | 21    |
| <i>Coccidioides posadasii</i> C735 delta SOWgp    | 0    | 1      | 6    | 3         | 5   | 3        | 1  | 19    |
| <i>Coccodinium bartschii</i> CBS 121709 v1.0      | 1    | 2      | 4    | 9         | 5   | 2        | 1  | 24    |
| <i>Cyphellophora europaea</i> CBS 101466          | 0    | 0      | 4    | 5         | 2   | 2        | 0  | 13    |
| <i>Endocarpon pusillum</i> Z07020                 | 2    | 2      | 3    | 4         | 16  | 3        | 2  | 32    |
| <i>Eurotiomyces</i> sp. JF 03-3F Goopy v1.0       | 0    | 0      | 4    | 8         | 3   | 2        | 0  | 17    |
| <i>Eurotiomyces</i> sp. JF 03-4F Slimy v1.0       | 0    | 0      | 4    | 8         | 3   | 2        | 0  | 17    |
| <i>Eurotium rubrum</i> v1.0                       | 2    | 0      | 4    | 8         | 12  | 2        | 1  | 29    |

| Genome                                           | DMAT | HYBRID | NRPS | NRPS-Like | PKS | PKS-Like | TC | Total |
|--------------------------------------------------|------|--------|------|-----------|-----|----------|----|-------|
| <i>Exophiala alcalophila</i> ATCC 48519 v1.0     | 0    | 0      | 3    | 3         | 3   | 2        | 0  | 11    |
| <i>Exophiala alcalophila</i> J33 v1.0            | 0    | 0      | 3    | 3         | 3   | 2        | 0  | 11    |
| <i>Exophiala aquamarina</i> CBS 119918           | 0    | 0      | 4    | 8         | 5   | 5        | 1  | 23    |
| <i>Exophiala dermatitidis</i> UT8656             | 0    | 0      | 4    | 3         | 2   | 3        | 0  | 12    |
| <i>Exophiala mesophila</i> CBS40295              | 0    | 0      | 2    | 5         | 1   | 2        | 0  | 10    |
| <i>Exophiala oligosperma</i> CBS72588            | 0    | 0      | 4    | 5         | 2   | 3        | 0  | 14    |
| <i>Exophiala sideris</i> CBS121828               | 0    | 0      | 2    | 3         | 2   | 2        | 0  | 9     |
| <i>Exophiala spinifera</i> CBS89968              | 0    | 0      | 3    | 8         | 3   | 2        | 0  | 16    |
| <i>Exophiala xenobiotica</i> CBS118157           | 0    | 0      | 2    | 4         | 5   | 3        | 0  | 14    |
| <i>Fonsecaea monophora</i> CBS 269.37            | 0    | 0      | 4    | 7         | 3   | 2        | 0  | 16    |
| <i>Fonsecaea multimorphosa</i> CBS 102226        | 0    | 0      | 2    | 8         | 4   | 2        | 0  | 16    |
| <i>Fonsecaea nubica</i> CBS 269.64               | 0    | 0      | 3    | 7         | 3   | 2        | 0  | 15    |
| <i>Fonsecaea pedrosoi</i> CBS 271.37             | 0    | 0      | 3    | 8         | 3   | 2        | 0  | 16    |
| <i>Gymnascella aurantiaca</i> v1.0               | 2    | 0      | 6    | 2         | 8   | 2        | 2  | 22    |
| <i>Gymnascella citrina</i> v1.1                  | 2    | 2      | 7    | 1         | 5   | 2        | 1  | 20    |
| <i>Histoplasma capsulatum</i> NAM1               | 0    | 0      | 5    | 4         | 1   | 2        | 1  | 13    |
| <i>Microsporium canis</i> CBS 113480             | 5    | 5      | 12   | 7         | 11  | 4        | 3  | 47    |
| <i>Monascus purpureus</i> v1.0                   | 0    | 2      | 7    | 5         | 4   | 5        | 0  | 23    |
| <i>Monascus ruber</i> NRRL 1597 v1.0             | 0    | 3      | 7    | 5         | 10  | 3        | 0  | 28    |
| <i>Neosartorya fischeri</i> NRRL 181             | 7    | 1      | 14   | 10        | 15  | 2        | 1  | 50    |
| <i>Paecilomyces niveus</i> CO7 v1.0              | 1    | 7      | 7    | 13        | 19  | 2        | 1  | 50    |
| <i>Paecilomyces variotii</i> CBS 101075 v1.0     | 0    | 3      | 5    | 8         | 6   | 2        | 3  | 27    |
| <i>Paecilomyces variotii</i> CBS144490 HYG1 v1.0 | 0    | 3      | 7    | 7         | 6   | 2        | 3  | 28    |
| <i>Paracoccidioides brasiliensis</i> Pb03        | 0    | 0      | 4    | 5         | 3   | 2        | 1  | 15    |
| <i>Paracoccidioides brasiliensis</i> Pb18        | 0    | 0      | 3    | 6         | 3   | 2        | 1  | 15    |
| <i>Penicillium antarcticum</i> IBT 31811         | 2    | 1      | 13   | 8         | 18  | 2        | 2  | 46    |
| <i>Penicillium atramentosum</i> RS17 v1.0        | 1    | 3      | 10   | 14        | 13  | 2        | 3  | 46    |
| <i>Penicillium bilaiae</i> ATCC 20851 v1.0       | 2    | 3      | 8    | 23        | 18  | 2        | 2  | 58    |
| <i>Penicillium brevicompactum</i> 1011305 v2.0   | 2    | 1      | 13   | 16        | 22  | 2        | 4  | 60    |
| <i>Penicillium brevicompactum</i> AgRF18 v1.0    | 2    | 1      | 15   | 15        | 24  | 2        | 3  | 62    |
| <i>Penicillium canescens</i> ATCC 10419 v1.0     | 2    | 2      | 14   | 10        | 26  | 3        | 5  | 62    |
| <i>Penicillium chrysogenum</i> Wisconsin 54-1255 | 1    | 2      | 7    | 15        | 18  | 3        | 3  | 49    |
| <i>Penicillium chrysogenum</i> v1.0              | 0    | 2      | 9    | 14        | 18  | 3        | 4  | 50    |
| <i>Penicillium coprophilum</i> IBT 31321         | 5    | 2      | 12   | 13        | 20  | 2        | 1  | 55    |
| <i>Penicillium decumbens</i> IBT 11843           | 1    | 2      | 4    | 5         | 8   | 1        | 1  | 22    |
| <i>Penicillium digitatum</i> PHI26               | 1    | 3      | 10   | 9         | 10  | 2        | 3  | 38    |
| <i>Penicillium digitatum</i> Pd1                 | 1    | 2      | 11   | 8         | 9   | 3        | 3  | 37    |



| Genome                                               | DMAT | HYBRID | NRPS | NRPS-Like | PKS | PKS-Like | TC | Total |
|------------------------------------------------------|------|--------|------|-----------|-----|----------|----|-------|
| <i>Penicillium expansum</i> ATCC 24692 v1.0          | 4    | 6      | 15   | 10        | 25  | 4        | 5  | 69    |
| <i>Penicillium expansum</i> d1                       | 3    | 6      | 16   | 10        | 21  | 3        | 3  | 62    |
| <i>Penicillium fellutanum</i> ATCC 48694 v1.0        | 1    | 1      | 7    | 9         | 12  | 2        | 1  | 33    |
| <i>Penicillium flavigenum</i> IBT 14082              | 4    | 2      | 11   | 15        | 18  | 3        | 4  | 57    |
| <i>Penicillium glabrum</i> DAOM 239074 v1.0          | 2    | 3      | 5    | 22        | 21  | 1        | 1  | 55    |
| <i>Penicillium griseofulvum</i> PG3                  | 3    | 3      | 10   | 16        | 21  | 4        | 1  | 58    |
| <i>Penicillium italicum</i> PHI-1                    | 0    | 3      | 7    | 7         | 19  | 3        | 4  | 43    |
| <i>Penicillium janthinellum</i> ATCC 10455 v1.0      | 2    | 1      | 9    | 10        | 14  | 3        | 4  | 43    |
| <i>Penicillium lanosocoeruleum</i> ATCC 48919 v1.0   | 3    | 4      | 12   | 13        | 21  | 2        | 6  | 61    |
| <i>Penicillium nalgiovense</i> FM193                 | 2    | 1      | 9    | 16        | 12  | 5        | 1  | 46    |
| <i>Penicillium nordicum</i> DAOMC 185683             | 3    | 1      | 19   | 12        | 20  | 3        | 2  | 60    |
| <i>Penicillium oxalicum</i> 114-2                    | 3    | 4      | 11   | 13        | 5   | 2        | 2  | 40    |
| <i>Penicillium polonicum</i> IBT 4502                | 4    | 6      | 17   | 17        | 19  | 3        | 2  | 68    |
| <i>Penicillium raistrickii</i> ATCC 10490 v1.0       | 3    | 5      | 13   | 16        | 23  | 3        | 4  | 67    |
| <i>Penicillium solitum</i> IBT 29525                 | 2    | 3      | 12   | 13        | 21  | 4        | 4  | 59    |
| <i>Penicillium solitum</i> IBT 30036 v1.0            | 2    | 4      | 11   | 12        | 20  | 2        | 5  | 56    |
| <i>Penicillium</i> sp. NC0857 v1.0                   | 2    | 0      | 9    | 10        | 14  | 4        | 1  | 40    |
| <i>Penicillium steckii</i> IBT 24891                 | 4    | 3      | 10   | 13        | 11  | 2        | 0  | 43    |
| <i>Penicillium subrubescens</i> FBCC1632 / CBS132785 | 3    | 1      | 11   | 12        | 21  | 3        | 0  | 51    |
| <i>Penicillium swiecickii</i> 182 6C1 v1.0           | 5    | 3      | 14   | 15        | 32  | 3        | 5  | 77    |
| <i>Penicillium thymicola</i> DAOMC 180753 v1.0       | 2    | 3      | 18   | 17        | 23  | 2        | 5  | 70    |
| <i>Penicillium vulpinum</i> IBT 29486                | 3    | 5      | 12   | 11        | 29  | 2        | 5  | 67    |
| <i>Phaeomoniella chlamydospora</i> UCRPC4            | 0    | 0      | 4    | 6         | 8   | 2        | 0  | 20    |
| <i>Phaeomoniellales</i> sp. NC0930 v1.0              | 0    | 0      | 10   | 11        | 5   | 3        | 0  | 29    |
| <i>Phialophora attae</i> CBS 131958                  | 0    | 0      | 1    | 4         | 3   | 2        | 0  | 10    |
| <i>Talaromyces aculeatus</i> ATCC 10409 v1.0         | 0    | 2      | 11   | 17        | 26  | 5        | 1  | 62    |
| <i>Talaromyces borbonicus</i> CBS 141340             | 2    | 3      | 8    | 8         | 16  | 2        | 2  | 41    |
| <i>Talaromyces marneffeii</i> ATCC 18224             | 1    | 2      | 8    | 13        | 18  | 5        | 2  | 49    |
| <i>Talaromyces proteolyticus</i> PMI_201 v1.0        | 4    | 2      | 8    | 13        | 40  | 3        | 1  | 71    |
| <i>Talaromyces stipitatus</i> ATCC 10500             | 1    | 3      | 6    | 15        | 29  | 6        | 4  | 64    |
| <i>Thermoascus aurantiacus</i> ATCC26904 v2.0        | 0    | 1      | 3    | 3         | 3   | 2        | 0  | 12    |
| <i>Thermoascus aurantiacus</i> v1.0                  | 0    | 1      | 3    | 3         | 3   | 2        | 0  | 12    |
| <i>Thermomyces lanuginosus</i> SSBP                  | 1    | 1      | 3    | 3         | 4   | 2        | 0  | 14    |
| <i>Trichophyton rubrum</i> CBS 118892                | 1    | 3      | 13   | 2         | 8   | 2        | 2  | 31    |
| <i>Trichophyton verrucosum</i> HKI 0517              | 3    | 3      | 12   | 5         | 7   | 2        | 2  | 34    |
| <i>Uncinocarpus reesii</i> UAMH 1704                 | 3    | 2      | 4    | 2         | 4   | 2        | 0  | 17    |
| <b>MUCOROMYCOTINA</b>                                |      |        |      |           |     |          |    |       |

| Genome                                                                 | DMAT | HYBRID | NRPS | NRPS-Like | PKS | PKS-Like | TC | Total |
|------------------------------------------------------------------------|------|--------|------|-----------|-----|----------|----|-------|
| <i>Absidia caerulea</i> NRRL1315 v1.0                                  | 0    | 0      | 1    | 1         | 1   | 1        | 0  | 4     |
| <i>Absidia padenii</i> NRRL 2977 v1.0                                  | 0    | 0      | 1    | 1         | 1   | 1        | 0  | 4     |
| <i>Absidia repens</i> NRRL 1336 v1.0                                   | 0    | 0      | 1    | 1         | 1   | 1        | 0  | 4     |
| <i>Amylomyces rouxii</i> NRRL 5866 v1.0                                | 0    | 0      | 1    | 7         | 2   | 1        | 0  | 11    |
| <i>Backusella circina</i> FSU 941 v1.0                                 | 0    | 0      | 1    | 5         | 2   | 1        | 0  | 9     |
| <i>Benjamiella poitrasii</i> RSA 903 v1.0                              | 0    | 0      | 1    | 5         | 2   | 1        | 0  | 9     |
| <i>Blakeslea trispora</i> F921 v1.0                                    | 0    | 0      | 1    | 3         | 1   | 1        | 0  | 6     |
| <i>Blakeslea trispora</i> F986 v1.0                                    | 0    | 0      | 1    | 3         | 1   | 1        | 0  | 6     |
| <i>Blakeslea trispora</i> NRRL 2456 v1.0                               | 0    | 0      | 1    | 3         | 1   | 1        | 0  | 6     |
| <i>Chaetocladium brefeldii</i> NRRL 2343 v1.0                          | 0    | 0      | 1    | 2         | 0   | 1        | 0  | 4     |
| <i>Choanephora cucurbitarum</i> NRRL2744 (50) v1.0                     | 0    | 0      | 1    | 5         | 1   | 1        | 0  | 8     |
| <i>Circinella umbellata</i> NRRL1351 v1.0                              | 0    | 0      | 0    | 4         | 1   | 1        | 0  | 6     |
| <i>Cokeromyces recurvatus</i> NRRL 2243 v1.0                           | 0    | 0      | 1    | 2         | 2   | 1        | 0  | 6     |
| <i>Cunninghamella echinulata</i> NRRL 1382 v1.0                        | 0    | 0      | 1    | 0         | 1   | 1        | 0  | 3     |
| <i>Dichotomocladium elegans</i> RSA 919-v1.0                           | 0    | 0      | 0    | 1         | 1   | 1        | 0  | 3     |
| <i>Dichotomocladium robustum</i> RSA 2353+ v1.0                        | 0    | 0      | 0    | 4         | 1   | 1        | 0  | 6     |
| <i>Ellisomyces anomalus</i> CBS 243.57 v2.0                            | 0    | 0      | 1    | 4         | 2   | 1        | 0  | 8     |
| <i>Endogone</i> sp FLAS 59071                                          | 0    | 0      | 0    | 2         | 1   | 1        | 0  | 4     |
| <i>Fennellomyces linderi</i> CBS 158.54 v1.0                           | 0    | 0      | 0    | 5         | 1   | 1        | 0  | 7     |
| <i>Fennellomyces</i> sp. T-0311 v1.0                                   | 0    | 0      | 0    | 5         | 1   | 1        | 0  | 7     |
| <i>Gilbertella persicaria</i> var. <i>persicaria</i> CBS 190.32-T v1.0 | 0    | 0      | 1    | 3         | 1   | 1        | 0  | 6     |
| <i>Gongronella butleri</i> v1.0                                        | 0    | 0      | 1    | 2         | 1   | 1        | 0  | 5     |
| <i>Halteromyces radiatus</i> CBS 162.75 v1.0                           | 0    | 0      | 1    | 1         | 1   | 1        | 0  | 4     |
| <i>Helicostylum pulchrum</i> RSA 2064 v1.0                             | 0    | 0      | 1    | 4         | 1   | 1        | 0  | 7     |
| <i>Hesseltinella vesiculosa</i> NRRL3301 v2.0                          | 0    | 0      | 1    | 2         | 1   | 1        | 0  | 5     |
| <i>Jimgerdemannia flammicorona</i> AD002                               | 0    | 0      | 0    | 2         | 0   | 1        | 0  | 3     |
| <i>Jimgerdemannia flammicorona</i> GMNB39                              | 0    | 0      | 0    | 1         | 1   | 1        | 0  | 3     |
| <i>Jimgerdemannia lactiflua</i> OSC166217                              | 0    | 0      | 0    | 3         | 0   | 1        | 0  | 4     |
| <i>Lentamyces parricidus</i> NRRL2409 v1.0                             | 0    | 0      | 0    | 6         | 1   | 1        | 0  | 8     |
| <i>Lentamyces zychnae</i> NRRL 2806 v1.0                               | 0    | 0      | 0    | 4         | 1   | 1        | 0  | 6     |
| <i>Lichtheimia corymbifera</i> JMRC:FSU:9682                           | 0    | 0      | 0    | 5         | 1   | 1        | 0  | 7     |
| <i>Lichtheimia hyalospora</i> v1.0                                     | 0    | 0      | 0    | 6         | 1   | 1        | 0  | 8     |
| <i>Mucor cordense</i> RSA 1222 v1.0                                    | 0    | 0      | 1    | 7         | 2   | 1        | 0  | 11    |
| <i>Mucor endophyticus</i>                                              | 0    | 0      | 1    | 2         | 1   | 1        | 0  | 5     |
| <i>Mucor fuscus</i>                                                    | 0    | 0      | 1    | 0         | 1   | 1        | 0  | 3     |
| <i>Mucor heterogamus</i> NRRL 1489 v1.0                                | 0    | 0      | 2    | 3         | 1   | 1        | 0  | 7     |
| <i>Mucor lanceolatus</i>                                               | 0    | 0      | 1    | 0         | 1   | 1        | 0  | 3     |

| Genome                                                             | DMAT | HYBRID | NRPS | NRPS-Like | PKS | PKS-Like | TC | Total |
|--------------------------------------------------------------------|------|--------|------|-----------|-----|----------|----|-------|
| <i>Mucor lusitanicus</i> (circinelloides) MU402 v1.0               | 0    | 0      | 1    | 4         | 2   | 1        | 0  | 8     |
| <i>Mucor lusitanicus</i> CBS277.49 v2.0                            | 0    | 0      | 1    | 4         | 2   | 1        | 0  | 8     |
| <i>Mucor mucedo</i> NRRL 3635 v1.0                                 | 0    | 0      | 1    | 4         | 1   | 1        | 0  | 7     |
| <i>Mucor racemosus</i>                                             | 0    | 0      | 1    | 2         | 2   | 1        | 0  | 6     |
| <i>Mycotypha africana</i> NRRL 2978 v1.0                           | 0    | 0      | 1    | 1         | 2   | 1        | 0  | 5     |
| <i>Mycotypha indica</i> IMI 211999 v1.0                            | 0    | 0      | 1    | 2         | 2   | 1        | 0  | 6     |
| <i>Parasitella parasitica</i> v1.0                                 | 0    | 0      | 1    | 2         | 2   | 1        | 0  | 6     |
| <i>Phascologyces articulatus</i> v1.0                              | 0    | 0      | 0    | 7         | 1   | 1        | 0  | 9     |
| <i>Phycomyces blakesleeanus</i> L51 v1.0                           | 0    | 0      | 0    | 2         | 1   | 1        | 0  | 4     |
| <i>Phycomyces blakesleeanus</i> NRRL1555 v2.0                      | 0    | 0      | 1    | 2         | 1   | 1        | 0  | 5     |
| <i>Phycomyces blakesleeanus</i> UBC1 v1.0                          | 0    | 0      | 1    | 1         | 1   | 1        | 0  | 4     |
| <i>Phycomyces blakesleeanus</i> UBC21 v2.0                         | 0    | 0      | 1    | 3         | 1   | 1        | 0  | 6     |
| <i>Phycomyces nitens</i> S607 v1.0                                 | 0    | 0      | 1    | 2         | 1   | 1        | 0  | 5     |
| <i>Phycomyces nitens</i> S608 v1.0                                 | 0    | 0      | 1    | 2         | 1   | 1        | 0  | 5     |
| <i>Phycomyces nitens</i> S609 v1.0                                 | 0    | 0      | 1    | 2         | 1   | 1        | 0  | 5     |
| <i>Pilaira anomala</i> RSA1997 v1.0                                | 0    | 0      | 1    | 3         | 1   | 1        | 0  | 6     |
| <i>Pilobolus umbonatus</i> NRRL 6349 v1.0                          | 0    | 0      | 1    | 0         | 1   | 1        | 0  | 3     |
| <i>Radiomyces spectabilis</i> NRRL 2753 v1.0                       | 0    | 0      | 0    | 3         | 1   | 1        | 0  | 5     |
| <i>Rhizopus delemar</i> 99-880 from Broad                          | 0    | 0      | 1    | 6         | 1   | 1        | 0  | 9     |
| <i>Rhizopus microsporus</i> ATCC11559 v1.0                         | 0    | 0      | 1    | 3         | 1   | 1        | 0  | 6     |
| <i>Rhizopus microsporus</i> var. <i>chinensis</i> CCTCC M201021    | 0    | 0      | 2    | 6         | 1   | 2        | 0  | 11    |
| <i>Rhizopus microsporus</i> var. <i>microsporus</i> ATCC52813 v1.0 | 0    | 0      | 1    | 3         | 1   | 1        | 0  | 6     |
| <i>Rhizopus microsporus</i> var. <i>microsporus</i> ATCC52814 v1.0 | 0    | 0      | 1    | 3         | 1   | 1        | 0  | 6     |
| <i>Saksenaea vasiformis</i> B4078                                  | 0    | 0      | 1    | 1         | 1   | 0        | 0  | 3     |
| <i>Spinellus fusiger</i> NRRL 22323 v1.0                           | 0    | 0      | 0    | 6         | 1   | 1        | 0  | 8     |
| <i>Sporodiniella umbellata</i> MES 1446 v1.0                       | 0    | 0      | 1    | 6         | 1   | 1        | 0  | 9     |
| <i>Syncephalastrum racemosum</i> NRRL 2496 v1.0                    | 0    | 0      | 0    | 7         | 1   | 1        | 0  | 9     |
| <i>Thamnidium elegans</i> v1.0                                     | 0    | 0      | 1    | 4         | 1   | 1        | 0  | 7     |
| <i>Umbelopsis isabellina</i> AD026 v1.0                            | 0    | 0      | 1    | 5         | 1   | 2        | 0  | 9     |
| <i>Umbelopsis ramanniana</i> AG # v1.0                             | 0    | 0      | 1    | 4         | 0   | 1        | 0  | 6     |
| <i>Umbelopsis</i> sp. PMI_123 v1.0                                 | 0    | 0      | 1    | 4         | 1   | 1        | 0  | 7     |
| <i>Umbelopsis</i> sp. nov. AD052 v1.0                              | 0    | 0      | 1    | 3         | 1   | 1        | 0  | 6     |
| <i>Zychoaea mexicana</i> RSA 1403 v1.0                             | 0    | 0      | 0    | 3         | 1   | 1        | 0  | 5     |
